# Supplementary material for: Metabolomics signatures of sweetened beverages and added sugar are related to anthropometric measures of adiposity in young individuals: results from a cohort study
Source: PubMed Central journal article supplement (PMC11473401; doi:10.1016/j.ajcnut.2024.07.021), 2024-07-24
Supplement: mmc1.pdf [file mmc1.pdf]

**Muli S, et al. Metabolomics signatures of sweetened beverages and added sugar are related to anthropometric measures of adiposity in young individuals: results from a cohort study**

Correspondence : [smuli@uni-bonn.de](mailto:smuli@uni-bonn.de)

## Supplemental information

### Table of contents

|                                                                                                                                                                               |    |
|-------------------------------------------------------------------------------------------------------------------------------------------------------------------------------|----|
| <b>Supplemental Figure 1.</b> Study population .....                                                                                                                          | 2  |
| <b>Children Urine:</b> IARC’s Metabolomics Analysis Report.....                                                                                                               | 3  |
| <b>Adolescent Urine and young adult plasma:</b> Metabolon’s Metabolomics Analysis Report.....                                                                                 | 4  |
| <b>Supplemental Figure 2.</b> Metabolite section procedures .....                                                                                                             | 7  |
| <b>Supplemental Table 1.</b> Machine learning selections of food-related metabolites in children ( <i>n</i> = 297) .....                                                      | 8  |
| <b>Supplemental Table 2.</b> Machine learning selections of food-related metabolites in ‘adolescent urine’ ( <i>n</i> = 339) .....                                            | 10 |
| <b>Supplemental Table 3.</b> Machine learning selections of food-related metabolites in ‘young adult plasma’ ( <i>n</i> = 195) .....                                          | 15 |
| <b>Supplemental Table 4.</b> Metabolite features associated with SBs and AS intake in children ( <i>n</i> = 297) .....                                                        | 19 |
| <b>Supplemental Table 5:</b> Metabolites associated with SBs and AS intake in ‘adolescent urine’ ( <i>n</i> = 339) .....                                                      | 20 |
| <b>Supplemental Table 6.</b> Metabolites associated with SBs and AS intake in ‘young adult plasma’ ( <i>n</i> = 195).....                                                     | 22 |
| <b>Supplemental Table 7:</b> Associations of coffee intake with caffeine metabolites in ‘adolescent urine’ ( <i>n</i> = 339) and ‘young adult plasma’ ( <i>n</i> = 195).....  | 23 |
| <b>Supplemental Table 8:</b> Associations of SSB intake with all caffeine metabolites in ‘adolescent urine’ ( <i>n</i> = 339) and ‘young adult plasma’ ( <i>n</i> = 195)..... | 24 |
| <b>Supplemental Figure 3.</b> Assessing potential bias due to different imputation methods on food-metabolite associations .....                                              | 25 |
| <b>Supplemental Table 9.</b> Food-related metabolites associated with adiposity using regularized regression in ‘adolescent urine’ .....                                      | 26 |
| <b>Supplemental Table 10.</b> Food-related metabolites associated with adiposity using regularized regression ‘young adult plasma’ ( <i>n</i> = 195).....                     | 28 |
| References .....                                                                                                                                                              | 29 |

**Supplemental Figure 1. Study population**

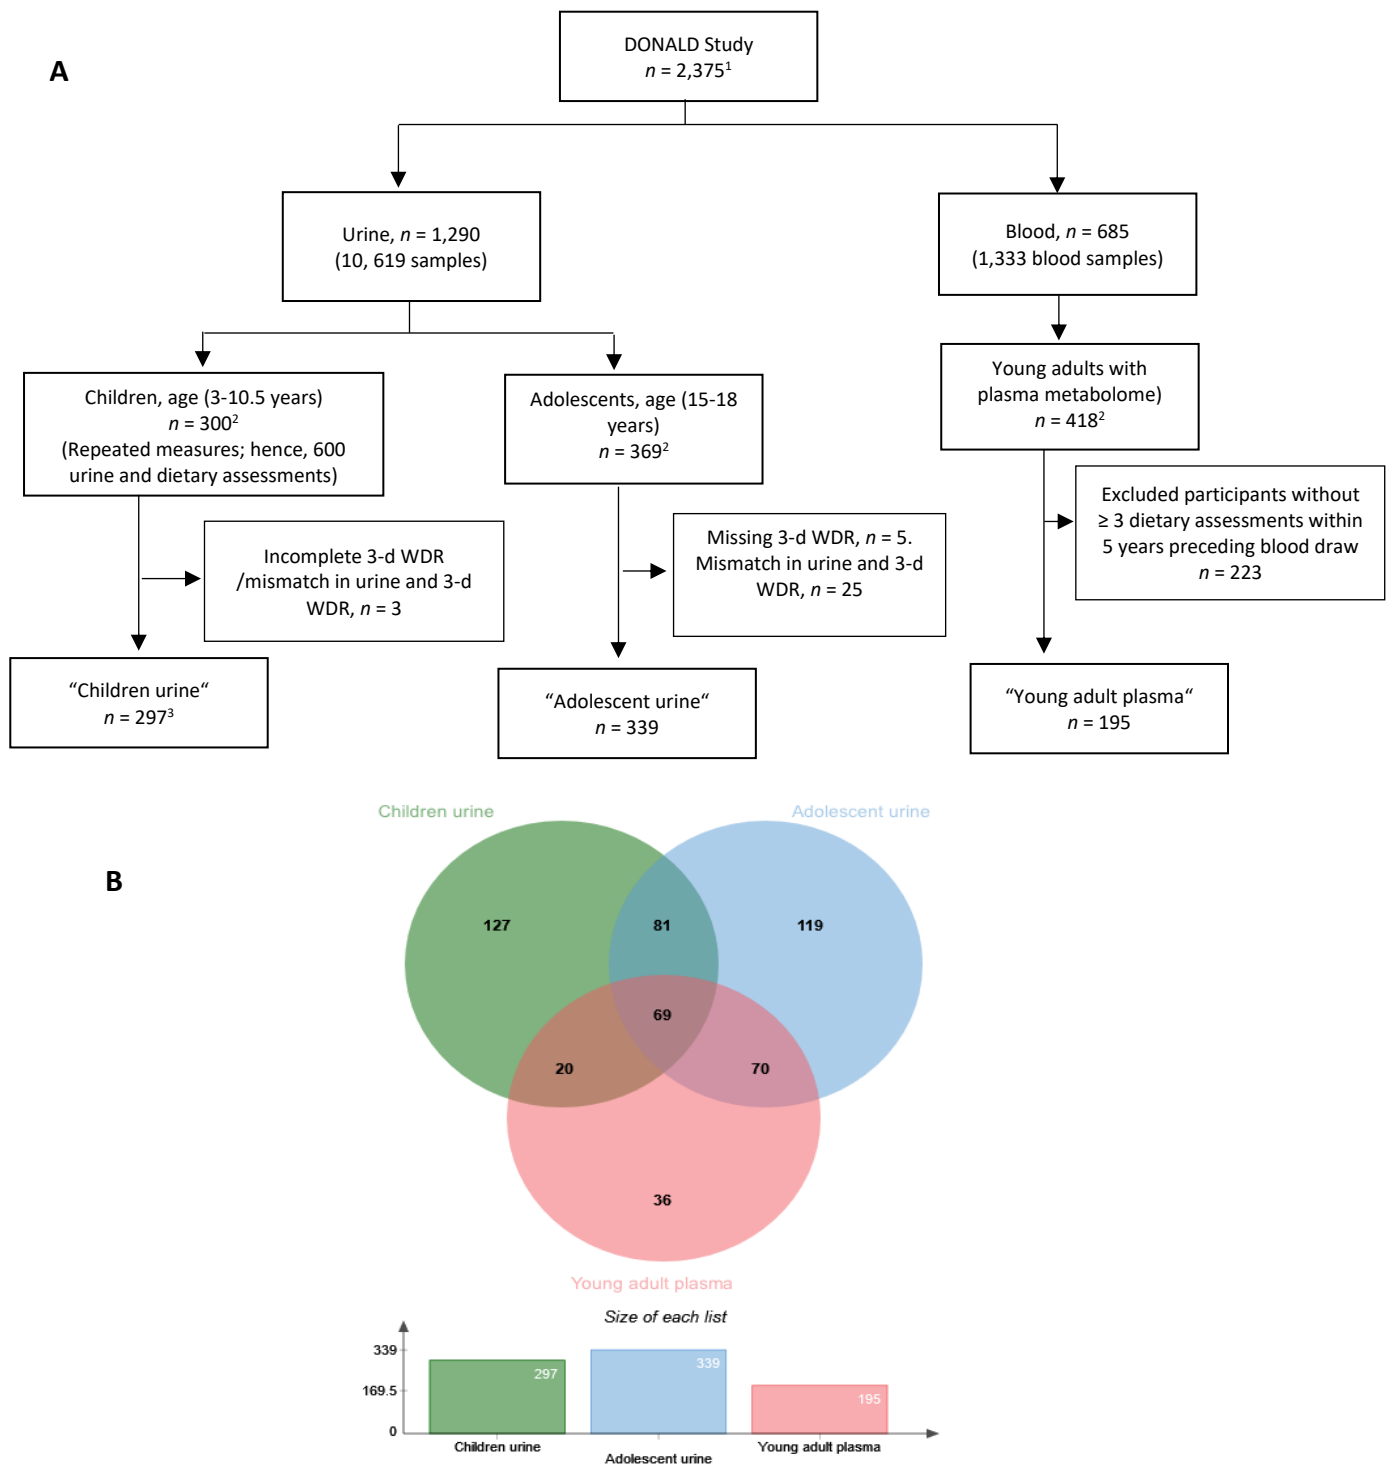

**Supplemental Figure 1. (A):** Flow diagram of the DONALD study samples included in the present analysis. <sup>1</sup>participants recruited between 1985 and December 2022. <sup>2</sup>these three samples were randomly selected among eligible urine and blood samples. <sup>3</sup> $n = 297$  of the 300 who provided two urine samples and dietary assessment were eligible (referred to as  $T_1$  in the manuscript). Out of these, 270 participants were eligible for inclusion as  $T_2$ , representing the second dietary and urine measurement. Therefore, the “children urine” sample consisted of  $n = 567$  urine and dietary samples that were jointly analyzed following appropriate methods for repeated measurements. **(B):** Overlap of the study participants across the analytic samples.

## Children Urine: IARC's Metabolomics Analysis Report

### Sample Preparation

Samples were prepared by diluting 30  $\mu\text{L}$  of urine with ultra-pure water based on normalization to lowest specific gravity in all samples (DONALD: 1.079). Then 30  $\mu\text{L}$  of the diluted urine samples were mixed with 270  $\mu\text{L}$  of cold acetonitrile in Agilent Captiva 96 Deep Well plates (Agilent Technologies France; ref: A696001000B). The precipitate was filtered and 100  $\mu\text{L}$  was transferred to Thermo Well 96 plates (Thermo Electron SAS; ref: 6820-4100). The plate was immediately sealed with a rapid EPS adhesive plate sheet (BioChromato; ref: BC-REPS001) and analysed. Quality control (QC) samples were prepared from a sample pool that was made by mixing small aliquots of all samples and extracted along with the study samples. Blank samples were also prepared along the urine samples in an identical manner, only leaving out urine in the process. Each well plate included four individually prepared QCs and two blanks.

### Sample Analysis

Samples were analysed as 4 independent analytical batches consisting of 2 individual 96-well plates. The repeated samples points were analysed next to each other in random order, and sample pairs were randomized across the batch. A UHPLC-QE-MS system was used that consisted of a Dionex UltiMate 3000 Binary LC system, and a Q-Exactive mass spectrometer with heated electrospray ionization (HESI-II) (Thermo Scientific). Samples were kept at 5°C and 2  $\mu\text{L}$  was injected. An ACQUITY UHPLC HSS T3 column (2.1  $\times$  100mm, 1.8  $\mu\text{m}$ ; Waters) was used at 45 °C and the mobile phase consisted of ultrapure water and LC-MS grade methanol, both with 0.05 % (v/v) of formic acid. The gradient profile was as follows: 0–6 min: 5% to 100% methanol, 6–10.5 min: 100% methanol, 10.5–13 min: 5% methanol. The flow rate was 0.4 ml/min.

The mass spectrometer was operated in a positive/negative switching polarity using the following conditions: spray voltage 4.0 kV, sheath gas flow rate 50 (Arbitrary unit; A.u), auxiliary gas flow rate 13 (A.u), sweep gas flow rate 3 (A.u), Aux gas heater temperature 425°C, capillary temperature 260°C and a S-Lens RF level 60%. For the analysis a full MS scan mode over a mass range of 66.7 to 1000 Da, at a resolution 35000 with an associated scan rate at 2.1Hz. AGC target 1e6 and a maximum injection time 50 ms was applied. MS/MS analyses were performed on QC samples with an isolation width of 2.0 Da, in positive and negative modes at 3 normalized collision energies 30, 60 and 90. Data was acquired in centroid format.

### Data Processing

Pre-processing was performed using Compound Discoverer 3.3 software (Thermo Fisher Scientific). A minimum peak intensity threshold and mass tolerance of 600 000 and 10 ppm respectively were used to find  $[\text{M}+\text{H}]^+$  ions in positive mode data. A minimum peak intensity threshold and mass tolerance of 500 000 and 10 ppm respectively were used to find  $[\text{M}-\text{H}]^-$  ions in negative mode data. Feature alignment between samples was performed with maximum retention time window of 0.05 min and mass tolerance of 5ppm. Features present in every blank sample were excluded, unless 5-fold greater in average intensity in samples. Peak areas were used as a measurement of intensity.

### Quality Control

Quality control was performed using data from the QC samples. The assessment was based on the following attributes:

- Response stability: in chronological order, area median response of features found in all QC samples
- Response variability: distribution of MS features according to their Relative Standard Deviations (RSD%) of features found in all QC samples
- Response variability: RSD% of known compounds in all QC samples.

### Identification of metabolites

The features indicated by the statistical analysis as significant were grouped by retention time (with a tolerance of 0.05 min) and intensity using Spearman correlation across all samples to help in finding features originating from the same compound, requiring a minimum of correlation coefficient of 0.75. The features were compared

with the in-house database of analytical standards with 10 ppm molecular weight and 0.25 min retention time tolerance and search of the m/z values against the Human Metabolome Database (HMDB) [1] with a 10 ppm mass tolerance, considering  $[M + H]^+$ ,  $[M + Na]^+$ , and  $[M - H_2O + H]^+$  adducts in positive mode and  $[M - H]^-$ ,  $[M + FA - H]^-$ , and  $[M - H_2O - H]^-$  in negative mode.

The quality of the chromatographic peaks and spectra was inspected, and the plausibility of database candidates was assessed based on retention time, isotope pattern, adduct formation and neutral losses. The best matching identities were confirmed by MS/MS spectra of standard MS/MS. When standards are not available, MS/MS spectra were compared against those in mzCloud ([www.mzcloud.org](http://www.mzcloud.org)) or METLIN ([www.metlin.scripps.edu](http://www.metlin.scripps.edu)) [2]. The level of identification was determined as proposed by Sumner et al. [3].

## **Adolescent Urine and young adult plasma: Metabolon's Metabolomics Analysis Report**

### **Metabolon Platform**

**Sample Accessioning:** Following receipt, samples were inventoried and immediately stored at  $-80^{\circ}\text{C}$ . Each sample received was accessioned into the Metabolon LIMS system and was assigned by the LIMS a unique identifier that was associated with the original source identifier only. This identifier was used to track all sample handling, tasks, results, etc. The samples (and all derived aliquots) were tracked by the LIMS system. All portions of any sample were automatically assigned their own unique identifiers by the LIMS when a new task was created; the relationship of these samples was also tracked. All samples were maintained at  $-80^{\circ}\text{C}$  until processed.

**Sample Preparation:** Samples were prepared using the automated MicroLab STAR<sup>®</sup> system from Hamilton Company. Several recovery standards were added prior to the first step in the extraction process for QC purposes. To remove protein, dissociate small molecules bound to protein or trapped in the precipitated protein matrix, and to recover chemically diverse metabolites, proteins were precipitated with methanol under vigorous shaking for 2 min (Glen Mills GenoGrinder 2000) followed by centrifugation. The resulting extract was divided into five fractions: two for analysis by two separate reverse phase (RP)/UPLC-MS/MS methods with positive ion mode electrospray ionization (ESI), one for analysis by RP/UPLC-MS/MS with negative ion mode ESI, one for analysis by HILIC/UPLC-MS/MS with negative ion mode ESI, and one sample was reserved for backup. Samples were placed briefly on a TurboVap<sup>®</sup> (Zymark) to remove the organic solvent. The sample extracts were stored overnight under nitrogen before preparation for analysis.

**QA/QC:** Several types of controls were analyzed in concert with the experimental samples: a pooled matrix sample generated by taking a small volume of each experimental sample (or alternatively, use of a pool of well-characterized human plasma) served as a technical replicate throughout the data set; extracted water samples served as process blanks; and a cocktail of QC standards that were carefully chosen not to interfere with the measurement of endogenous compounds were spiked into every analyzed sample, allowed instrument performance monitoring and aided chromatographic alignment. Instrument variability was determined by calculating the median relative standard deviation (RSD) for the standards that were added to each sample prior to injection into the mass spectrometers. Overall process variability was determined by calculating the median RSD for all endogenous metabolites (i.e., non-instrument standards) present in 100% of the pooled matrix samples. Experimental samples were randomized across the platform run with QC samples spaced evenly among the injections

**Ultrahigh Performance Liquid Chromatography-Tandem Mass Spectroscopy (UPLC-MS/MS):** All methods utilized a Waters ACQUITY ultra-performance liquid chromatography (UPLC) and a Thermo Scientific Q-Exactive high resolution/accurate mass spectrometer interfaced with a heated electrospray ionization (HESI-II) source and Orbitrap mass analyzer operated at 35,000 mass resolution. The sample extract was dried then reconstituted in solvents compatible to each of the four methods. Each reconstitution solvent contained a series of standards at fixed concentrations to ensure injection and chromatographic consistency. One aliquot was analyzed using acidic positive ion conditions, chromatographically optimized for more hydrophilic compounds. In this method, the

extract was gradient eluted from a C18 column (Waters UPLC BEH C18-2.1x100 mm, 1.7  $\mu$ m) using water and methanol, containing 0.05% perfluoropentanoic acid (PFPA) and 0.1% formic acid (FA). Another aliquot was also analyzed using acidic positive ion conditions, however it was chromatographically optimized for more hydrophobic compounds. In this method, the extract was gradient eluted from the same afore mentioned C18 column using methanol, acetonitrile, water, 0.05% PFPA and 0.01% FA and was operated at an overall higher organic content. Another aliquot was analyzed using basic negative ion optimized conditions using a separate dedicated C18 column. The basic extracts were gradient eluted from the column using methanol and water, however with 6.5mM Ammonium Bicarbonate at pH 8. The fourth aliquot was analyzed via negative ionization following elution from a HILIC column (Waters UPLC BEH Amide 2.1x150 mm, 1.7  $\mu$ m) using a gradient consisting of water and acetonitrile with 10mM Ammonium Formate, pH 10.8. The MS analysis alternated between MS and data-dependent MS<sup>n</sup> scans using dynamic exclusion. The scan range varied slightly between methods but covered 70-1000 m/z. Raw data files are archived and extracted as described below.

**Bioinformatics:** The informatics system consisted of four major components, the Laboratory Information Management System (LIMS), the data extraction and peak-identification software, data processing tools for QC and compound identification, and a collection of information interpretation and visualization tools for use by data analysts. The hardware and software foundations for these informatics components were the LAN backbone, and a database server running Oracle 10.2.0.1 Enterprise Edition.

**LIMS:** The purpose of the Metabolon LIMS system was to enable fully auditable laboratory automation through a secure, easy to use, and highly specialized system. The scope of the Metabolon LIMS system encompasses sample accessioning, sample preparation and instrumental analysis and reporting and advanced data analysis. All of the subsequent software systems are grounded in the LIMS data structures. It has been modified to leverage and interface with the in-house information extraction and data visualization systems, as well as third party instrumentation and data analysis software.

**Data Extraction and Compound Identification:** Raw data was extracted, peak-identified and QC processed using Metabolon's hardware and software. These systems are built on a web-service platform utilizing Microsoft's .NET technologies, which run on high-performance application servers and fiber-channel storage arrays in clusters to provide active failover and load-balancing. Compounds were identified by comparison to library entries of purified standards or recurrent unknown entities. Metabolon maintains a library based on authenticated standards that contains the retention time/index (RI), mass to charge ratio (*m/z*), and chromatographic data (including MS/MS spectral data) on all molecules present in the library. Furthermore, biochemical identifications are based on three criteria: retention index within a narrow RI window of the proposed identification, accurate mass match to the library +/- 10 ppm, and the MS/MS forward and reverse scores between the experimental data and authentic standards. The MS/MS scores are based on a comparison of the ions present in the experimental spectrum to the ions present in the library spectrum. While there may be similarities between these molecules based on one of these factors, the use of all three data points can be utilized to distinguish and differentiate biochemicals. More than 3300 commercially available purified standard compounds have been acquired and registered into LIMS for analysis on all platforms for determination of their analytical characteristics. Additional mass spectral entries have been created for structurally unnamed biochemicals, which have been identified by virtue of their recurrent nature (both chromatographic and mass spectral). These compounds have the potential to be identified by future acquisition of a matching purified standard or by classical structural analysis.

**Curation:** A variety of curation procedures were carried out to ensure that a high quality data set was made available for statistical analysis and data interpretation. The QC and curation processes were designed to ensure accurate and consistent identification of true chemical entities, and to remove those representing system artifacts, mis-assignments, and background noise. Metabolon data analysts use proprietary visualization and interpretation software to confirm the consistency of peak identification among the various samples. Library matches for each compound were checked for each sample and corrected if necessary.

**Metabolite Quantification and Data Normalization:** Peaks were quantified using area-under-the-curve. For studies spanning multiple days, a data normalization step was performed to correct variation resulting from

instrument inter-day tuning differences. Essentially, each compound was corrected in run-day blocks by registering the medians to equal one (1.00) and normalizing each data point proportionately i.e., “block correction”. For studies that did not require more than one day of analysis, no normalization is necessary, other than for purposes of data visualization. In certain instances, biochemical data may have been normalized to an additional factor (e.g., cell counts, total protein as determined by Bradford assay, osmolality, etc.) to account for differences in metabolite levels due to differences in the amount of material present in each sample.

#### **Complex Lipids Platform: Adolescent Plasma**

Lipids were extracted from samples in methanol:dichloromethane in the presence of internal standards. The extracts were concentrated under nitrogen and reconstituted in 0.25mL of 10mM ammonium acetate dichloromethane:methanol (50:50). The extracts were transferred to inserts and placed in vials for infusion-MS analysis, performed on a Shimadzu LC with nano PEEK tubing and the Sciex Selexion-5500 QTRAP. The samples were analyzed via both positive and negative mode electrospray. The 5500 QTRAP scan was performed in MRM mode with the total of more than 1,100 MRMs. Individual lipid species were quantified by taking the peak area ratios of target compounds and their assigned internal standards, then multiplying by the concentration of internal standard added to the sample. Lipid class concentrations were calculated from the sum of all molecular species within a class, and fatty acid compositions were determined by calculating the proportion of each class comprised by individual fatty acids.

**Supplemental Figure 2.** Metabolite selection procedures

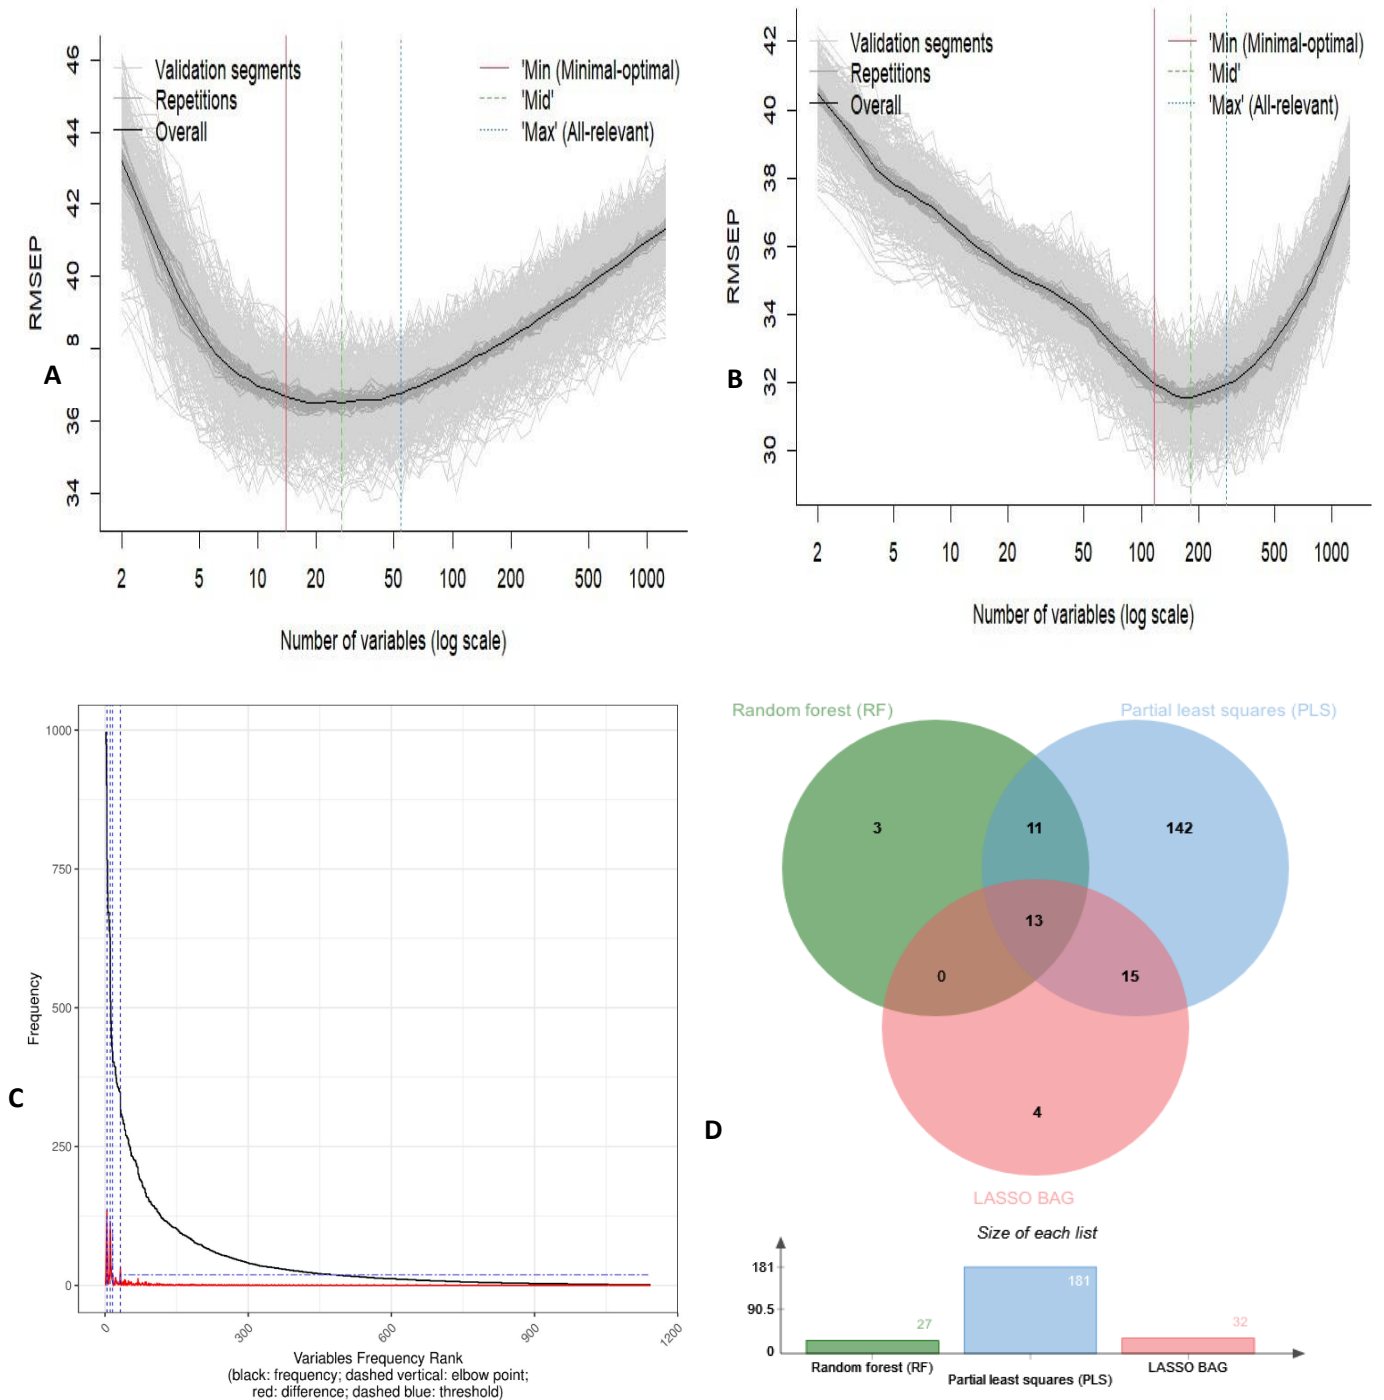

**Supplemental Figure 2.** An example of AS metabolites in urine adolescent ( $n = 339$ ). **A** and **B**: Random forest (RF) and partial least squares (PLS) regression models, respectively. In both models, the light grey lines represent validation performance for the individual inner segments, while the darker grey lines represent inner segment validation curves averaged over the repetitions. Three model results are returned: Minimal-optimal (Min), Mid, and All-relevant (Max). The Min model selects the smallest set of metabolites that optimizes the method performance and identifies the strongest predictors of target variable Y (dietary intake). The Max model includes all the strongest predictors, including redundant, but not necessarily spurious. The Mid model is a trade-off between the Min and Max models, and was used for the present analysis. **C**: The “Curve Elbow Point” (CEP) detection method for LASSO bagging models. The most important metabolites are those with a high frequency of selection, separated from the rest by a sharp drop in the observed frequency. Metabolites at or above the elbow point were considered important of intake. **D**: The overlap of metabolite selection (for AS) across the models. Metabolites were selected by a “two out of three” ML approach, which effectively balances flexibility and reliability. Unless otherwise specified, we modelled all dietary variables (SSB, SBs, and AS) as continuous, and LNCSB, which had few consumers was dichotomized into consumers vs non-consumers.

**Supplemental Table 1.** Machine learning selections of food-related metabolites in children (*n* = 297)

| <b>Metabolite feature</b> | <b>LNCSB</b>       | <b>SSB</b>         | <b>SBs</b>         | <b>AS</b>          |
|---------------------------|--------------------|--------------------|--------------------|--------------------|
| 168.05358@1.786           | RF, LASSO-BAG, PLS | -                  | RF, LASSO-BAG, PLS | -                  |
| 182.99887@2.451           | RF, LASSO-BAG, PLS | -                  | -                  | -                  |
| 184.08475@1.608           | RF, PLS            | -                  | RF, LASSO-BAG, PLS | RF, PLS            |
| 198.1007@2.172            | RF, PLS            | -                  | -                  | -                  |
| 233.03563@1.471           | RF, PLS            | -                  | RF, LASSO-BAG, PLS | RF, PLS            |
| 256.14245@3.937           | RF, PLS            | -                  | -                  | RF, PLS            |
| 121.91727@0.601           | -                  | RF, LASSO-BAG, PLS | LASSO-BAG, PLS     | -                  |
| 128.0841@3.753            | -                  | RF, LASSO-BAG, PLS | RF, PLS            | -                  |
| 129.96719@0.626           | -                  | LASSO-BAG, PLS     | -                  | -                  |
| 134.10968@4.712           | -                  | -                  | RF, PLS            | -                  |
| 136.03732@0.724           | -                  | LASSO-BAG, PLS     | -                  | -                  |
| 142.02683@2.132           | -                  | -                  | RF, LASSO-BAG, PLS | -                  |
| 148.08901@3.889           | -                  | RF, PLS            | -                  | -                  |
| 150.06827@4.068           | -                  | -                  | -                  | RF, PLS            |
| 152.12024@4.714           | -                  | RF, PLS            | RF, PLS            | -                  |
| 153.04277@2.289           | -                  | -                  | -                  | RF, LASSO-BAG, PLS |
| 158.05809@2.816           | -                  | -                  | -                  | RF, PLS            |
| 165.0652@1.186            | -                  | -                  | -                  | LASSO-BAG, PLS     |
| 165.07939@2.148           | -                  | -                  | -                  | RF, PLS            |
| 166.04911@1.902           | -                  | -                  | -                  | RF, PLS            |
| 168.02863@0.967           | -                  | -                  | -                  | LASSO-BAG, PLS     |
| 176.06858@3.179           | -                  | -                  | RF, LASSO-BAG, PLS | -                  |
| 180.06467@2.415           | -                  | -                  | -                  | RF, PLS            |
| 183.05335@1.813           | -                  | LASSO-BAG, PLS     | -                  | -                  |
| 189.04266@3.053           | -                  | -                  | RF, PLS            | -                  |
| 195.05254@2.557           | -                  | -                  | -                  | RF, PLS            |
| 214.08427@3.876           | -                  | -                  | -                  | RF, PLS            |
| 214.12043@5.044           | -                  | -                  | RF, PLS            | -                  |
| 217.09495@1.938           | -                  | -                  | -                  | RF, LASSO-BAG      |
| 220.00374@1.773           | -                  | LASSO-BAG, PLS     | -                  | -                  |
| 228.11091@0.776           | -                  | -                  | -                  | RF, LASSO-BAG, PLS |
| 230.12675@2.177           | -                  | -                  | -                  | RF, LASSO-BAG, PLS |
| 234.01955@2.357           | -                  | -                  | -                  | RF, LASSO-BAG, PLS |
| 242.12665@3.379           | -                  | -                  | RF, LASSO-BAG, PLS | RF, LASSO-BAG, PLS |
| 244.08815@2.104           | -                  | -                  | -                  | RF, PLS            |
| 246.14676@4.666           | -                  | -                  | -                  | LASSO-BAG, PLS     |
| 256.14227@3.906           | -                  | RF, LASSO-BAG, PLS | RF, LASSO-BAG, PLS | RF, PLS            |
| 258.15795@4.241           | -                  | -                  | RF, PLS            | RF, LASSO-BAG, PLS |
| 258.15815@4.273           | -                  | -                  | LASSO-BAG, PLS     | RF, PLS            |
| 259.08166@0.781           | -                  | -                  | -                  | LASSO-BAG, PLS     |
| 259.99915@3.019           | -                  | RF, LASSO-BAG, PLS | RF, LASSO-BAG, PLS | -                  |
| 261.12113@0.936           | -                  | -                  | LASSO-BAG, PLS     | -                  |
| 280.10589@2.888           | -                  | -                  | -                  | LASSO-BAG, PLS     |
| 282.11048@4.718           | -                  | LASSO-BAG, PLS     | LASSO-BAG, PLS     | -                  |



|                 |   |                    |                    |                    |
|-----------------|---|--------------------|--------------------|--------------------|
| 284.0897@3.588  | - | -                  | -                  | RF, PLS            |
| 290.09368@2.095 | - | -                  | -                  | LASSO-BAG, PLS     |
| 301.11611@3.557 | - | -                  | -                  | RF, PLS            |
| 311.20953@4.339 | - | RF, PLS            | RF, PLS            | RF, PLS            |
| 342.1315@4.916  | - | -                  | -                  | RF, PLS            |
| 345.21495@2.18  | - | RF, LASSO-BAG, PLS | RF, LASSO-BAG, PLS | -                  |
| 346.16262@3.85  | - | RF, LASSO-BAG, PLS | RF, LASSO-BAG, PLS | RF, LASSO-BAG, PLS |
| 346.16262@4.744 | - | -                  | -                  | RF, PLS            |
| 346.16267@4.709 | - | RF, PLS            | -                  | -                  |
| 358.10867@5.056 | - | -                  | LASSO-BAG, PLS     | -                  |
| 364.09779@0.732 | - | RF, PLS            | RF, PLS            | -                  |
| 378.0928@0.759  | - | RF, LASSO-BAG, PLS | LASSO-BAG, PLS     | RF, LASSO-BAG, PLS |
| 440.08768@0.759 | - | -                  | -                  | RF, LASSO-BAG, PLS |
| 453.19967@4.707 | - | LASSO-BAG, PLS     | -                  | -                  |

Abbreviations: AS, added sugar; LASSO-BAG, Least Absolute Shrinkage and Selection Operator with bagging algorithm; LNCSB, low- and no-calorie sweetened beverages; PLS, partial least squares; RF, random forest; SBs, total sweetened beverages; SSB, sugar sweetened beverages.

**Supplemental Table 2.** Machine learning selections of food-related metabolites in ‘adolescent urine’ (*n* = 339)

| metabolite                         | LNCSB          | SSB            | SBs            | AS             | HMDB ID   | RI     | Mass      | Platform           | Pubchem ID | superpathway |
|------------------------------------|----------------|----------------|----------------|----------------|-----------|--------|-----------|--------------------|------------|--------------|
| saccharin                          | RF, LASSO, PLS | -              | LASSO, PLS     | -              | HMDB29723 | 2000   | 181.99173 | LC/MS Neg          | 5143       | Xenobiotics  |
| X - 11612                          | RF, LASSO, PLS | -              | -              | -              | -         | 1633   | 283.06849 | LC/MS Neg          | -          | -            |
| acesulfame                         | RF, LASSO, PLS | -              | RF, LASSO, PLS | -              | HMDB33585 | 1581   | 161.98665 | LC/MS Neg          | 36573      | Xenobiotics  |
| X - 24794                          | RF, LASSO, PLS | -              | RF, PLS        | -              | -         | 1131   | 123.05621 | LC/MS Neg          | -          | -            |
| 3-hydroxyisonicotinic acid         | RF, LASSO, PLS | -              | -              | -              | -         | 1497   | 138.01966 | LC/MS Neg          | 459503     | Xenobiotics  |
| 3-hydroxybenzoate                  | RF, PLS        | -              | -              | -              | HMDB02466 | 1180   | 137.02442 | LC/MS Polar        | 7420       | Xenobiotics  |
| 1,6-anhydroglucose                 | LASSO, PLS     | -              | -              | -              | HMDB00640 | 1175.5 | 207.05102 | LC/MS Polar        | 2724705    | Xenobiotics  |
| benzoylcarnitine*                  | LASSO, PLS     | -              | -              | LASSO, PLS     | -         | 3041   | 266.13869 | LC/MS Pos<br>Early | -          | Xenobiotics  |
| X - 17349                          | LASSO, PLS     | -              | -              | -              | -         | 2497   | 367.10412 | LC/MS Neg          | -          | -            |
| X - 17679                          | LASSO, PLS     | RF, LASSO, PLS | RF, LASSO, PLS | RF, LASSO, PLS | -         | 1775   | 199.09797 | LC/MS Neg          | -          | -            |
| X - 24414                          | RF, PLS        | -              | -              | -              | -         | 1965   | 234.08027 | LC/MS Neg          | -          | -            |
| 5-hydroxy-2-methylpyridine sulfate | LASSO, PLS     | -              | -              | -              | -         | 2074   | 188.0023  | LC/MS Neg          | -          | Xenobiotics  |
| sucrose                            | -              | -              | -              | RF, LASSO, PLS | HMDB00258 | 865    | 341.10894 | LC/MS Neg          | 5988       | Carbohydrate |
| 3-hydroxyisobutyrate               | -              | LASSO, PLS     | LASSO, PLS     | -              | HMDB00336 | 1619   | 103.04007 | LC/MS Polar        | 87         | Amino Acid   |
| 3-hydroxypropanoate                | -              | LASSO, PLS     | -              | -              | HMDB00700 | 1845   | 89.02442  | LC/MS Polar        | 68152      | Lipid        |
| indolelactate                      | -              | -              | -              | RF, LASSO, PLS | HMDB00671 | 2286   | 204.06661 | LC/MS Neg          | 92904      | Amino Acid   |
| 2-hydroxyoctanoate                 | -              | RF, LASSO, PLS | RF, LASSO, PLS | -              | HMDB02264 | 3736.8 | 159.10266 | LC/MS Neg          | 94180      | Lipid        |
| phenyllactate (PLA)                | -              | -              | -              | LASSO, PLS     | HMDB00779 | 908    | 165.05571 | LC/MS Polar        | 3848       | Amino Acid   |
| alpha-hydroxyisocaproate           | -              | -              | -              | LASSO, PLS     | HMDB00746 | 1840   | 131.07136 | LC/MS Neg          | 83697      | Amino Acid   |
| N-formylmethionine                 | -              | LASSO, PLS     | LASSO, PLS     | -              | HMDB01015 | 1543.8 | 176.03869 | LC/MS Neg          | 439750     | Amino Acid   |
| 1-methylhistidine                  | -              | -              | -              | LASSO, PLS     | HMDB00001 | 1227   | 168.07785 | LC/MS Neg          | 92105      | Amino Acid   |

|                                 |   |                   |                   |                   |           |        |           |                    |          |                           |
|---------------------------------|---|-------------------|-------------------|-------------------|-----------|--------|-----------|--------------------|----------|---------------------------|
| 3-hydroxysebacate               | - | LASSO, PLS        | -                 | -                 | HMDB00350 | 2411   | 217.10814 | LC/MS Polar        | 3017884  | Lipid                     |
| 3-hydroxyanthranilate           | - | -                 | -                 | LASSO, PLS        | HMDB01476 | 2407   | 154.04987 | LC/MS Pos<br>Early | 86       | Amino Acid                |
| decanoylcarnitine (C10)         | - | -                 | -                 | LASSO, PLS        | HMDB00651 | 1130   | 316.24824 | LC/MS Pos<br>Late  | 10245190 | Lipid                     |
| 1-methylxanthine                | - | LASSO, PLS        | -                 | LASSO, PLS        | HMDB10738 | 1568.8 | 165.0418  | LC/MS Neg          | 80220    | Xenobiotics               |
| phosphocholine                  | - | -                 | -                 | LASSO, PLS        | HMDB01565 | 700    | 184.07332 | LC/MS Pos<br>Early | 1014     | Lipid                     |
| AAMU                            | - | LASSO, PLS        | LASSO, PLS        | -                 | HMDB04400 | 1710   | 197.06801 | LC/MS Polar        | 88299    | Xenobiotics               |
| 5-methyluridine (ribothymidine) | - | -                 | -                 | RF, LASSO,<br>PLS | HMDB00884 | 1778.1 | 257.07791 | LC/MS Neg          | 445408   | Nucleotide                |
| hydroquinone sulfate            | - | LASSO, PLS        | LASSO, PLS        | -                 | HMDB02434 | 1395   | 188.98631 | LC/MS Neg          | 161220   | Xenobiotics               |
| 3-methyladipate                 | - | RF, LASSO,<br>PLS | RF, LASSO,<br>PLS | -                 | HMDB00555 | 2865   | 159.06628 | LC/MS Polar        | 12292    | Lipid                     |
| N-carbamoylsarcosine            | - | LASSO, PLS        | -                 | -                 | HMDB12265 | 920    | 133.06077 | LC/MS Pos<br>Early | 439375   | Amino Acid                |
| homocitrate                     | - | LASSO, PLS        | -                 | LASSO, PLS        | HMDB03518 | 1179   | 224.0765  | LC/MS Pos<br>Early | 439459   | Xenobiotics               |
| N-methylhydantoin               | - | LASSO, PLS        | -                 | -                 | HMDB03646 | 1425   | 113.03565 | LC/MS Neg          | 69217    | Amino Acid                |
| carboxyethyl-GABA               | - | LASSO, PLS        | -                 | -                 | HMDB02201 | 2085   | 176.09174 | LC/MS Pos<br>Early | 2572     | Amino Acid                |
| cis-urocanate                   | - | LASSO, PLS        | -                 | LASSO, PLS        | HMDB34174 | 1200   | 137.03565 | LC/MS Neg          | 1549103  | Amino Acid                |
| 2-oxo-1-pyrrolidinepropionate   | - | LASSO, PLS        | LASSO, PLS        | -                 | -         | 1600   | 158.08117 | LC/MS Pos<br>Early | 3146688  | Xenobiotics               |
| 2PYr                            | - | LASSO, PLS        | RF, LASSO,<br>PLS | -                 | HMDB04193 | 1668   | 151.0513  | LC/MS Neg          | 69698    | Cofactors and<br>Vitamins |
| gamma-CEHC glucuronide*         | - | RF, PLS           | -                 | -                 | -         | 2500   | 439.16097 | LC/MS Neg          | -        | Cofactors and<br>Vitamins |
| 2-aminophenol sulfate           | - | RF, PLS           | -                 | -                 | HMDB61116 | 1677   | 188.0023  | LC/MS Neg          | 181670   | Xenobiotics               |
| gamma-CEHC                      | - | -                 | RF, PLS           | -                 | HMDB01931 | 3843   | 263.12888 | LC/MS Neg          | 133098   | Cofactors and<br>Vitamins |
| X - 21258                       | - | RF, LASSO,<br>PLS | RF, LASSO         | -                 | -         | 3915   | 213.02316 | LC/MS Neg          | -        | -                         |
| X - 21312                       | - | LASSO, PLS        | LASSO, PLS        | -                 | -         | 2757.7 | 243.03368 | LC/MS Neg          | -        | -                         |
| X - 11478                       | - | -                 | -                 | RF, PLS           | -         | 4285   | 165.09214 | LC/MS Neg          | -        | -                         |
| X - 12472                       | - | -                 | -                 | RF, PLS           | -         | 2528   | 241.11935 | LC/MS Neg          | -        | -                         |

|                                                              |   |                   |                   |                   |   |      |           |                    |          |             |
|--------------------------------------------------------------|---|-------------------|-------------------|-------------------|---|------|-----------|--------------------|----------|-------------|
| X - 21825                                                    | - | LASSO, PLS        | LASSO, PLS        | -                 | - | 3220 | 234.07805 | LC/MS Neg          | -        | -           |
| X - 21831                                                    | - | -                 | RF, LASSO         | -                 | - | 3480 | 363.16759 | LC/MS Neg          | -        | -           |
| X - 21847                                                    | - | -                 | -                 | RF, LASSO,<br>PLS | - | 4270 | 403.10512 | LC/MS Neg          | -        | -           |
| X - 18887                                                    | - | -                 | -                 | RF, LASSO,<br>PLS | - | 2229 | 328.15182 | LC/MS Neg          | -        | -           |
| X - 18410                                                    | - | -                 | -                 | RF, PLS           | - | 1538 | 305.07041 | LC/MS Neg          | -        | -           |
| X - 11640                                                    | - | -                 | -                 | RF, PLS           | - | 3769 | 377.07052 | LC/MS Neg          | -        | -           |
| X - 12101                                                    | - | -                 | -                 | RF, PLS           | - | 2700 | 164.07386 | LC/MS Pos<br>Early | -        | -           |
| X - 11858                                                    | - | -                 | -                 | RF, LASSO,<br>PLS | - | 4414 | 437.0555  | LC/MS Neg          | -        | -           |
| X - 19299                                                    | - | LASSO, PLS        | LASSO, PLS        | -                 | - | 3728 | 227.12896 | LC/MS Neg          | -        | -           |
| X - 19497                                                    | - | RF, LASSO,<br>PLS | RF, LASSO,<br>PLS | -                 | - | 3643 | 227.12921 | LC/MS Neg          | -        | -           |
| X - 17327                                                    | - | -                 | -                 | RF, PLS           | - | 2750 | 257.14918 | LC/MS Pos<br>Early | -        | -           |
| X - 17328                                                    | - | LASSO, PLS        | LASSO, PLS        | -                 | - | 910  | 308.18508 | LC/MS Pos<br>Late  | -        | -           |
| X - 18126                                                    | - | LASSO, PLS        | -                 | -                 | - | 2415 | 134.11749 | LC/MS Pos<br>Early | -        | -           |
| X - 12221                                                    | - | LASSO, PLS        | -                 | -                 | - | 1467 | 203.99752 | LC/MS Neg          | -        | -           |
| X - 12722                                                    | - | -                 | -                 | RF, LASSO,<br>PLS | - | 1871 | 249.00774 | LC/MS Neg          | -        | -           |
| X - 12726                                                    | - | -                 | -                 | LASSO, PLS        | - | 1942 | 233.01287 | LC/MS Neg          | -        | -           |
| X - 12823                                                    | - | -                 | -                 | RF, PLS           | - | 2815 | 167.0383  | LC/MS Neg          | -        | -           |
| X - 13844                                                    | - | -                 | RF, PLS           | -                 | - | 1442 | 209.05715 | LC/MS Neg          | -        | -           |
| X - 17010                                                    | - | LASSO, PLS        | -                 | RF, PLS           | - | 3178 | 189.11359 | LC/MS Neg          | -        | -           |
| gentisic acid-5-glucoside                                    | - | -                 | LASSO, PLS        | -                 | - | 1434 | 315.07215 | LC/MS Neg          | 10914066 | Xenobiotics |
| X - 23159 - retired for<br>chenodeoxycholic acid sulfate (1) | - | LASSO, PLS        | -                 | -                 | - | 4548 | 235.11739 | LC/MS Neg          | -        | -           |
| X - 23587                                                    | - | LASSO, PLS        | LASSO, PLS        | -                 | - | 1230 | 132.10181 | LC/MS Pos<br>Early | -        | -           |
| X - 23665                                                    | - | -                 | -                 | RF, PLS           | - | 2894 | 217.15428 | LC/MS Pos<br>Early | -        | -           |

|                                                         |   |                |            |                |           |      |           |                 |         |                        |
|---------------------------------------------------------|---|----------------|------------|----------------|-----------|------|-----------|-----------------|---------|------------------------|
| 2-hydroxybutyrate/2-hydroxyisobutyrate                  | - | LASSO, PLS     | -          | -              | -         | 1258 | 103.04006 | LC/MS Polar     | -       | Amino Acid             |
| X - 24330                                               | - | -              | -          | LASSO, PLS     | -         | 1546 | 225.07673 | LC/MS Neg       | -       | -                      |
| X - 24333                                               | - | -              | RF, PLS    | RF, LASSO, PLS | -         | 1789 | 202.10837 | LC/MS Neg       | -       | -                      |
| X - 24413                                               | - | -              | -          | LASSO, PLS     | -         | 2795 | 159.14909 | LC/MS Pos Early | -       | -                      |
| X - 24435                                               | - | LASSO, PLS     | -          | -              | -         | 6625 | 465.30368 | LC/MS Neg       | -       | -                      |
| X - 24470                                               | - | -              | -          | LASSO, PLS     | -         | 2252 | 306.15433 | LC/MS Pos Early | -       | -                      |
| X - 24543                                               | - | -              | LASSO, PLS | -              | -         | 2823 | 275.02364 | LC/MS Neg       | -       | -                      |
| 3-hydroxyhexanoate                                      | - | -              | -          | RF, PLS        | -         | 1725 | 131.07136 | LC/MS Neg       | 151492  | Lipid                  |
| caffeic acid sulfate                                    | - | LASSO, PLS     | -          | RF, LASSO, PLS | HMDB41708 | 1307 | 258.99179 | LC/MS Polar     | -       | Xenobiotics            |
| 3-hydroxybutyrate (BHBA)                                | - | RF, LASSO, PLS | RF, PLS    | RF, LASSO, PLS | HMDB00357 | 1444 | 103.04007 | LC/MS Polar     | 441     | Lipid                  |
| 2-butenoylglycine                                       | - | -              | -          | RF, PLS        | -         | 1380 | 142.05096 | LC/MS Neg       | 6303498 | Lipid                  |
| 3-heptenoylglutamine                                    | - | LASSO, PLS     | -          | -              | -         | 3220 | 255.13503 | LC/MS Neg       | -       | Lipid                  |
| androsterone glucuronide                                | - | LASSO, PLS     | -          | -              | HMDB02829 | 4953 | 465.24939 | LC/MS Neg       | 114833  | Lipid                  |
| 3-carboxy-4-methyl-5-pentyl-2-furanpropionate (3-CMPFP) | - | LASSO, PLS     | LASSO, PLS | -              | -         | 4000 | 267.12379 | LC/MS Neg       | 194501  | Lipid                  |
| glucuronide of C10H18O2 (8)*                            | - | RF, PLS        | RF, PLS    | -              | -         | 3865 | 345.1555  | LC/MS Neg       | -       | PCM                    |
| glucuronide of C10H18O2 (9)*                            | - | RF, LASSO, PLS | RF, PLS    | -              | -         | 4010 | 345.1555  | LC/MS Neg       | -       | PCM                    |
| glucuronide of C10H14O2 (2)*                            | - | -              | RF, PLS    | -              | -         | 3154 | 341.12419 | LC/MS Neg       | -       | PCM                    |
| glucuronide of C8H14O2 (6)*                             | - | -              | -          | LASSO, PLS     | -         | 4027 | 317.12419 | LC/MS Neg       | -       | PCM                    |
| glutamine conjugate of C8H12O4 (2)*                     | - | LASSO, PLS     | LASSO, PLS | -              | -         | 1143 | 299.12486 | LC/MS Neg       | -       | PCM                    |
| gamma-CEHC taurine*                                     | - | RF, PLS        | RF, PLS    | -              | -         | 3917 | 370.13298 | LC/MS Neg       | -       | Cofactors and Vitamins |
| 4-hydroxycatechol sulfate                               | - | LASSO, PLS     | -          | -              | -         | 1210 | 204.98123 | LC/MS Neg       | -       | Xenobiotics            |
| (2,4 or 2,5)-dimethylphenol sulfate                     | - | -              | -          | RF, LASSO, PLS | -         | 3474 | 201.0227  | LC/MS Neg       | -       | Xenobiotics            |
| 1-carboxyethylisoleucine                                | - | -              | -          | RF, LASSO, PLS | -         | 2628 | 202.10848 | LC/MS Neg       | -       | Amino Acid             |

|                                   |   |                   |                   |   |   |      |           |                    |         |             |
|-----------------------------------|---|-------------------|-------------------|---|---|------|-----------|--------------------|---------|-------------|
| 4-acetylcatechol sulfate (1)      | - | RF, LASSO,<br>PLS | RF, LASSO,<br>PLS | - | - | 1774 | 230.99688 | LC/MS Neg          | -       | Xenobiotics |
| 4-acetylcatechol sulfate (2)      | - | LASSO, PLS        | -                 | - | - | 2193 | 230.99688 | LC/MS Neg          | -       | Xenobiotics |
| hydroxy-N6,N6,N6-trimethyllysine* | - | LASSO, PLS        | -                 | - | - | 2759 | 205.15468 | LC/MS Pos<br>Early | -       | Amino Acid  |
| N,N-dimethylalanine               | - | RF, LASSO,<br>PLS | RF, LASSO,<br>PLS | - | - | 1370 | 118.08626 | LC/MS Pos<br>Early | 5488191 | Amino Acid  |
| pentose acid*                     | - | LASSO, PLS        | -                 | - | - | 2180 | 165.04046 | LC/MS Polar        | -       | PCM         |

Metabolites with a prefix "X-" followed by a number (e.g., X - 17679) are molecular features whose biochemical identities are unknown, but their monoatomic mass and retention time (RT) were characterized. \*Indicates metabolites that were not confirmed based on a standard, but Metabolon are confident in its identity.

Abbreviations: 2PYr, N1-Methyl-2-pyridone-5-carboxamide; AAMU, 5-acetylamino-6-amino-3-methyluracil; AS, added sugar; LASSO, Least Absolute Shrinkage and Selection Operator with bagging algorithm; LNCSB, low- and no-calorie sweetened beverages; PCM, Partially characterized molecules; PLS, partial least squares; RF, random forest; RI, mass spectral fragmentation and retention index; SBs, total sweetened beverages; SSB, sugar sweetened beverages.

**Supplemental Table 3.** Machine learning selections of food-related metabolites in ‘young adult plasma’ (n = 195)

| metabolite                             | LNCSB          | SSB            | SBs            | AS             | HMDB ID   | RI     | Mass     | Platform           | Pubchem ID | Super pathway |
|----------------------------------------|----------------|----------------|----------------|----------------|-----------|--------|----------|--------------------|------------|---------------|
| citrate                                | RF, LASSO, PLS | -              | -              | -              | HMDB00094 | 582    | 191.0197 | LC/MS Neg          | 311        | Energy        |
| 1-methylxanthine                       | RF, LASSO, PLS | RF, LASSO, PLS | RF, LASSO, PLS | RF, PLS        | HMDB10738 | 1568.8 | 165.0418 | LC/MS Neg          | 80220      | Xenobiotics   |
| aconitate [cis or trans]               | RF, LASSO, PLS | -              | -              | -              | -         | 580    | 173.0092 | LC/MS Neg          | -          | Energy        |
| adipoylcarnitine (C6-DC)               | RF, LASSO, PLS | -              | RF, PLS        | -              | HMDB61677 | 2570   | 290.1598 | LC/MS Pos<br>Early | 71296139   | Lipid         |
| X - 24951                              | RF, LASSO, PLS | -              | LASSO, PLS     | -              | -         | -      | -        | LC/MS Neg          | -          | -             |
| 3,5-dichloro-2,6-dihydroxybenzoic acid | RF, LASSO, PLS | -              | RF, LASSO, PLS | RF, LASSO, PLS | -         | 693    | 220.9414 | LC/MS Polar        | -          | Xenobiotics   |
| threonine                              | RF, PLS        | -              | -              | -              | HMDB00167 | 1514   | 120.0655 | LC/MS Pos<br>Early | 6288       | Amino Acid    |
| choline                                | RF, PLS        | -              | -              | -              | HMDB00097 | 1961   | 104.107  | LC/MS Pos<br>Early | 305        | Lipid         |
| 5-hydroxylysine                        | RF, PLS        | -              | -              | -              | HMDB00450 | 2790   | 163.1077 | LC/MS Pos<br>Early | 1029       | Amino Acid    |
| paraxanthine                           | RF, PLS        | -              | -              | -              | HMDB01860 | 2279   | 179.0575 | LC/MS Neg          | 4687       | Xenobiotics   |
| theophylline                           | RF, PLS        | -              | -              | -              | HMDB01889 | 2356.9 | 179.0575 | LC/MS Neg          | 2153       | Xenobiotics   |
| 3-ureidopropionate                     | RF, PLS        | -              | -              | -              | HMDB00026 | 875    | 133.0608 | LC/MS Pos<br>Early | 111        | Nucleotide    |
| 1,3-dimethylurate                      | RF, PLS        | LASSO, PLS     | LASSO, PLS     | -              | HMDB01857 | 1671.4 | 195.0524 | LC/MS Neg          | 70346      | Xenobiotics   |
| AAMU                                   | RF, PLS        | RF, LASSO, PLS | RF, LASSO, PLS | LASSO, PLS     | HMDB04400 | 1710   | 197.068  | LC/MS Polar        | 88299      | Xenobiotics   |
| hydroquinone sulfate                   | RF, PLS        | -              | LASSO, PLS     | -              | HMDB02434 | 1395   | 188.9863 | LC/MS Neg          | 161220     | Xenobiotics   |
| octadecanedioate (C18)                 | RF, PLS        | -              | -              | -              | HMDB00782 | 5043   | 313.2384 | LC/MS Neg          | 70095      | Lipid         |
| erythronate*                           | RF, PLS        | -              | -              | -              | HMDB00613 | 2186   | 135.0299 | LC/MS Polar        | 2781043    | Carbohydrate  |
| 6-oxopiperidine-2-carboxylate          | RF, PLS        | -              | -              | -              | HMDB61705 | 965    | 142.051  | LC/MS Neg          | 3014237    | Amino Acid    |
| 2-piperidinone                         | RF, PLS        | -              | -              | -              | HMDB11749 | 1675   | 100.0757 | LC/MS Pos<br>Early | 12665      | Xenobiotics   |
| methionine sulfone                     | RF, PLS        | -              | -              | -              | -         | 1250   | 182.0482 | LC/MS Pos<br>Early | 69961      | Amino Acid    |
| X - 11381                              | LASSO, PLS     | -              | -              | -              | -         | -      | -        | LC/MS Neg          | -          | -             |
| X - 12847                              | RF, PLS        | -              | -              | -              | -         | -      | -        | LC/MS Neg          | -          | -             |

|                                               |            |            |            |                |           |       |          |                 |          |                        |
|-----------------------------------------------|------------|------------|------------|----------------|-----------|-------|----------|-----------------|----------|------------------------|
| methyl-4-hydroxybenzoate sulfate              | RF, PLS    | -          | -          | -              | -         | 2873  | 230.9969 | LC/MS Neg       | -        | Xenobiotics            |
| 3beta-hydroxy-5-cholestenoate                 | RF, PLS    | -          | -          | LASSO, PLS     | -         | 5398  | 415.3218 | LC/MS Neg       | 165511   | Lipid                  |
| gamma-glutamyl-alpha-lysine                   | RF, PLS    | -          | -          | -              | -         | 2784  | 276.1554 | LC/MS Pos Early | 65254    | Peptide                |
| caffeine                                      | RF, PLS    | LASSO, PLS | LASSO, PLS | -              | HMDB01847 | 2106  | 195.0877 | LC/MS Pos Early | 2519     | Xenobiotics            |
| glutamate                                     | RF, PLS    | -          | -          | -              | HMDB00148 | 1500  | 148.0604 | LC/MS Pos Early | 611      | Amino Acid             |
| histidine                                     | RF, PLS    | -          | -          | -              | HMDB00177 | 755.9 | 154.0622 | LC/MS Neg       | 6274     | Amino Acid             |
| 3-hydroxyoleate*                              | RF, PLS    | -          | -          | -              | -         | 5508  | 297.2435 | LC/MS Neg       | -        | Lipid                  |
| octadecenedioate (C18:1-DC)                   | LASSO, PLS | -          | -          | -              | -         | 4875  | 311.2228 | LC/MS Neg       | -        | Lipid                  |
| octadecanedioylcarnitine (C18-DC)*            | LASSO, PLS | -          | -          | -              | -         | 1227  | 458.3476 | LC/MS Pos Late  | -        | Lipid                  |
| 3-hydroxybutyrylglycine                       | RF, PLS    | -          | -          | -              | -         | 978   | 162.0761 | LC/MS Pos Early | -        | Lipid                  |
| 2R,3R-dihydroxybutyrate                       | RF, PLS    | -          | -          | -              | HMDB00498 | 1543  | 119.035  | LC/MS Polar     | 13120901 | Lipid                  |
| glutamine conjugate of C6H10O2 (1)*           | RF, PLS    | -          | LASSO, PLS | RF, PLS        | -         | 2404  | 241.1194 | LC/MS Neg       | -        | PCM                    |
| glutamine conjugate of C6H10O2 (2)*           | RF, PLS    | -          | -          | -              | -         | 2526  | 241.1194 | LC/MS Neg       | -        | PCM                    |
| 3-bromo-5-chloro-2,6-dihydroxybenzoic acid*   | LASSO, PLS | -          | -          | -              | -         | 4505  | 264.8909 | LC/MS Neg       | -        | Xenobiotics            |
| ornithine                                     | -          | -          | -          | RF, PLS        | HMDB03374 | 2800  | 133.0972 | LC/MS Pos Early | 6262     | Amino Acid             |
| gamma-glutamylphenylalanine                   | -          | -          | -          | RF, PLS        | HMDB00594 | 1825  | 293.1143 | LC/MS Neg       | 111299   | Peptide                |
| gamma-glutamyltryptophan                      | -          | -          | -          | LASSO, PLS     | HMDB29160 | 1960  | 332.1252 | LC/MS Neg       | 3989307  | Peptide                |
| AFMU                                          | -          | -          | -          | LASSO, PLS     | HMDB11105 | 1424  | 225.0629 | LC/MS Polar     | 108214   | Xenobiotics            |
| 5alpha-androstan-3alpha,17beta-diol disulfate | -          | -          | -          | RF, LASSO, PLS | -         | 4275  | 225.0697 | LC/MS Neg       | -        | Lipid                  |
| 4-cholesten-3-one                             | -          | LASSO, PLS | -          | -              | HMDB00921 | 2520  | 385.3465 | LC/MS Pos Late  | 91477    | Lipid                  |
| isoleucylglycine                              | -          | -          | -          | LASSO, PLS     | HMDB28907 | 1992  | 187.1088 | LC/MS Neg       | 342532   | Peptide                |
| pregnanediol-3-glucuronide                    | -          | RF, PLS    | -          | -              | HMDB10318 | 5145  | 495.2963 | LC/MS Neg       | 123796   | Lipid                  |
| bilirubin                                     | -          | -          | -          | RF, PLS        | HMDB00054 | 1840  | 585.2708 | LC/MS Pos Late  | 5280352  | Cofactors and Vitamins |



|                                            |   |                |                |                |           |      |          |                    |         |                           |
|--------------------------------------------|---|----------------|----------------|----------------|-----------|------|----------|--------------------|---------|---------------------------|
| gamma-glutamylmethionine                   | - | -              | -              | RF, PLS        | HMDB29155 | 2640 | 279.1009 | LC/MS Pos<br>Early | 7009567 | Peptide                   |
| pyroglutamine*                             | - | -              | -              | RF, LASSO, PLS | -         | 1900 | 129.0659 | LC/MS Pos<br>Early | 134508  | Amino Acid                |
| X - 11308                                  | - | -              | LASSO, PLS     | -              | -         | -    | -        | LC/MS Neg          | -       | -                         |
| X - 13866                                  | - | LASSO, PLS     | -              | -              | -         | -    | -        | LC/MS Neg          | -       | -                         |
| X - 11530                                  | - | -              | -              | RF, PLS        | -         | -    | -        | LC/MS Neg          | -       | -                         |
| X - 12462                                  | - | RF, PLS        | RF, PLS        | -              | -         | -    | -        | LC/MS Pos<br>Early | -       | -                         |
| X - 15492                                  | - | -              | -              | RF, PLS        | -         | -    | -        | LC/MS Neg          | -       | -                         |
| X - 21736                                  | - | -              | RF, PLS        | -              | -         | -    | -        | LC/MS Neg          | -       | -                         |
| etiocolanolone glucuronide                 | - | -              | -              | LASSO, PLS     | HMDB04484 | 4915 | 465.2494 | LC/MS Neg          | 270605  | Lipid                     |
| X - 11858                                  | - | -              | -              | LASSO, PLS     | -         | -    | -        | LC/MS Neg          | -       | -                         |
| X - 13431                                  | - | -              | -              | RF, PLS        | -         | -    | -        | LC/MS Pos<br>Late  | -       | -                         |
| X - 17340                                  | - | -              | RF, PLS        | -              | -         | -    | -        | LC/MS Neg          | -       | -                         |
| X - 16087                                  | - | LASSO, PLS     | LASSO, PLS     | -              | -         | -    | -        | LC/MS Neg          | -       | -                         |
| N-formylphenylalanine                      | - | -              | LASSO, PLS     | -              | -         | 2360 | 192.0666 | LC/MS Neg          | 759256  | Amino Acid                |
| X - 23739                                  | - | -              | -              | RF, LASSO, PLS | -         | -    | -        | LC/MS Pos<br>Early | -       | -                         |
| alpha-ketobutyrate                         | - | -              | -              | LASSO, PLS     | HMDB00005 | 940  | 101.0244 | LC/MS Polar        | 58      | Amino Acid                |
| X - 24337                                  | - | -              | LASSO, PLS     | -              | -         | -    | -        | LC/MS Neg          | -       | -                         |
| X - 24475                                  | - | -              | -              | LASSO, PLS     | -         | -    | -        | LC/MS Pos<br>Early | -       | -                         |
| X - 24669                                  | - | RF, LASSO, PLS | LASSO, PLS     | LASSO, PLS     | -         | -    | -        | LC/MS Neg          | -       | -                         |
| X - 24849                                  | - | -              | -              | RF, PLS        | -         | -    | -        | LC/MS Neg          | -       | -                         |
| arachidonoylcarnitine (C20:4)              | - | RF, PLS        | -              | RF, PLS        | -         | 1353 | 448.3422 | LC/MS Pos<br>Late  | -       | Lipid                     |
| dihomo-linolenoylcarnitine (C20:3n3 or 6)* | - | LASSO, PLS     | RF, LASSO, PLS | RF, LASSO, PLS | -         | 1392 | 450.3578 | LC/MS Pos<br>Late  | -       | Lipid                     |
| carotene diol (1)                          | - | RF, LASSO, PLS | LASSO, PLS     | RF, LASSO, PLS | -         | 1720 | 568.4276 | LC/MS Pos<br>Late  | -       | Cofactors and<br>Vitamins |
| cortolone glucuronide (1)                  | - | -              | -              | LASSO, PLS     | -         | 4600 | 541.2654 | LC/MS Neg          | -       | Lipid                     |
| 2-hydroxynervonate*                        | - | RF, PLS        | RF, PLS        | -              | -         | 6345 | 381.3374 | LC/MS Neg          | 5312783 | Lipid                     |

|                                                                        |   |                |            |                |           |        |          |                    |          |             |
|------------------------------------------------------------------------|---|----------------|------------|----------------|-----------|--------|----------|--------------------|----------|-------------|
| 2-hydroxyphytanate*                                                    | - | RF, LASSO, PLS | -          | -              | -         | 5751   | 327.2905 | LC/MS Neg          | 189026   | Lipid       |
| 3-CMPFP                                                                | - | LASSO, PLS     | LASSO, PLS | -              | HMDB61643 | 4000   | 267.1238 | LC/MS Neg          | 194501   | Lipid       |
| sulfate of piperine metabolite<br>C18H21NO3 (3)*                       | - | LASSO, PLS     | LASSO, PLS | LASSO, PLS     | -         | 4630   | 378.1017 | LC/MS Neg          | -        | Xenobiotics |
| linolenamide (18:3)*                                                   | - | -              | -          | RF, LASSO, PLS | -         | 1510   | 278.2479 | LC/MS Pos<br>Late  | -        | Lipid       |
| palmitoyl-sphingosine-<br>phosphoethanolamine<br>(d18:1/16:0)          | - | -              | -          | LASSO, PLS     | -         | 2207   | 661.5279 | LC/MS Pos<br>Late  | -        | Lipid       |
| cholesterol                                                            | - | LASSO, PLS     | RF, PLS    | RF, LASSO, PLS | HMDB00067 | 2707   | 369.3516 | LC/MS Pos<br>Late  | 11025495 | Lipid       |
| N,N-dimethylalanine                                                    | - | -              | -          | LASSO, PLS     | -         | 1370   | 118.0863 | LC/MS Pos<br>Early | 5488191  | Amino Acid  |
| branched-chain, straight-chain,<br>or cyclopropyl 10:1 fatty acid (1)* | - | LASSO, PLS     | -          | -              | -         | 4805   | 169.1234 | LC/MS Neg          | -        | PCM         |
| decadienedioic acid (C10:2-DC)                                         | - | RF, PLS        | -          | -              | -         | 2329.7 | 197.0819 | LC/MS Polar        | -        | Lipid       |

Metabolites with a prefix "X-" followed by a number (e.g., X - 17679) are molecular features whose biochemical identities are unknown, but their monoatomic mass and retention time (RT) were characterized. \*Indicates metabolites that were not confirmed based on a standard, but Metabolon are confident in its identity.

Abbreviations: 3-CMPFP, 3-carboxy-4-methyl-5-pentyl-2-furanpropionate; AAMU, 5-acetylamino-6-amino-3-methyluracil; AFMU, 5-acetylamino-6-formylamino-3-methyluracil; AS, added sugar; LASSO, Least Absolute Shrinkage and Selection Operator with bagging algorithm; LNCSB, low- and no-calorie sweetened beverages; PCM, partially characterized molecules; PLS, partial least squares; RF, random forest; RI, mass spectral fragmentation and retention index; SBs, total sweetened beverages; SSB, sugar sweetened beverages.

**Supplemental Table 4.** Metabolite features associated with SBs and AS intake in children (*n* = 297)

| Foods         | feature         | Mass      | RT (min) | m/z       | Annotation <sup>1</sup>                    | MSI |
|---------------|-----------------|-----------|----------|-----------|--------------------------------------------|-----|
| SSB, SB       | 121.91727@0.601 | 121.91727 | 0.601    | 122.92455 | —                                          | —   |
| SSB           | 128.0841@3.753  | 128.0841  | 3.753    | 127.0768  | —                                          | —   |
| SSB           | 129.96719@0.626 | 129.96719 | 0.626    | 128.95991 | —                                          | —   |
| SB            | 134.10968@4.712 | 134.10968 | 4.712    | 135.11696 | —                                          | —   |
| SSB           | 136.03732@0.724 | 136.03732 | 0.724    | 135.03004 | —                                          | —   |
| SB            | 142.02683@2.132 | 142.02683 | 2.132    | 143.0341  | —                                          | —   |
| SSB           | 148.08901@3.889 | 148.08901 | 3.889    | 149.09629 | —                                          | —   |
| AS            | 150.06827@4.068 | 150.06827 | 4.068    | 149.0610  | —                                          | —   |
| SSB, SB       | 152.12024@4.714 | 152.12024 | 4.714    | 153.12752 | —                                          | —   |
| AS            | 153.04277@2.289 | 153.04277 | 2.289    | 154.05005 | —                                          | —   |
| AS            | 158.05809@2.816 | 158.05809 | 2.816    | 157.05081 | —                                          | —   |
| AS            | 165.0652@1.186  | 165.0652  | 1.186    | 166.07248 | 7-Methylguanine (HMDB000089)               | 1   |
| AS            | 165.07939@2.148 | 165.07939 | 2.148    | 166.08667 | —                                          | —   |
| AS            | 166.04911@1.902 | 166.04911 | 1.902    | 167.05639 | —                                          | —   |
| AS            | 168.02863@0.967 | 168.02863 | 0.967    | 167.02135 | Uric acid (HMDB0000289)                    | 2   |
| LNCSB, SB     | 168.05358@1.786 | 168.05358 | 1.786    | 169.06086 | —                                          | —   |
| SB            | 176.06858@3.179 | 176.06858 | 3.179    | 175.0613  | —                                          | —   |
| AS            | 180.06467@2.415 | 180.06467 | 2.415    | 181.07195 | Theobromine (HMDB0002825)                  | 1   |
| LNCSB         | 182.99887@2.451 | 182.99887 | 2.451    | 181.99159 | Saccharin (HMDB0029723)                    | 2   |
| SSB           | 183.05335@1.813 | 183.05335 | 1.813    | 182.04607 | 4-Pyridoxic acid (HMDB0000017)             | 2   |
| LNCSB, SB, AS | 184.08475@1.608 | 184.08475 | 1.608    | 185.09203 | -                                          | —   |
| SB            | 189.04266@3.053 | 189.04266 | 3.053    | 190.04994 | Kynurenic acid (HMDB0000715)               | 1   |
| LNCSB         | 198.1007@2.172  | 198.1007  | 2.172    | 199.10798 | —                                          | —   |
| AS            | 214.08427@3.876 | 214.08427 | 3.876    | 213.07699 | —                                          | —   |
| SB            | 214.12043@5.044 | 214.12043 | 5.044    | 213.11315 | —                                          | —   |
| SSB           | 220.00374@1.773 | 220.00374 | 1.773    | 221.01102 | —                                          | —   |
| AS            | 228.11091@0.776 | 228.11091 | 0.776    | 227.10363 | —                                          | —   |
| SB, AS        | 233.03563@1.471 | 233.03563 | 1.471    | 234.04291 | —                                          | —   |
| AS            | 234.01955@2.357 | 234.01955 | 2.357    | 233.01227 | —                                          | —   |
| AS            | 244.08815@2.104 | 244.08815 | 2.104    | 245.09543 | —                                          | —   |
| SSB, AS       | 256.14227@3.906 | 256.14227 | 3.906    | 257.14955 | —                                          | —   |
| AS            | 256.14245@3.937 | 256.14245 | 3.937    | 257.14973 | —                                          | —   |
| AS            | 258.15795@4.241 | 258.15795 | 4.241    | 259.16523 | —                                          | —   |
| AS            | 258.15815@4.273 | 258.15815 | 4.273    | 257.15087 | —                                          | —   |
| SSB, SB       | 259.99915@3.019 | 259.99915 | 3.019    | 258.99187 | —                                          | —   |
| SB            | 261.12113@0.936 | 261.12113 | 0.936    | 262.12841 | —                                          | —   |
| AS            | 280.10589@2.888 | 280.10589 | 2.888    | 281.11317 | Aspartylphenylalanine (HMDB0000706)        | 2   |
| SSB, SB       | 282.11048@4.718 | 282.11048 | 4.718    | 281.1032  | —                                          | —   |
| AS            | 284.0897@3.588  | 284.0897  | 3.588    | 283.08242 | —                                          | —   |
| AS            | 290.09368@2.095 | 290.09368 | 2.095    | 289.0864  | —                                          | —   |
| AS            | 301.11611@3.557 | 301.11611 | 3.557    | 302.12339 | —                                          | —   |
| SSB, SB, AS   | 311.20953@4.339 | 311.20953 | 4.339    | 312.21681 | Decadienoylcarnitine (Acylcarnitine C10:2) | 2   |
| AS            | 342.1315@4.916  | 342.1315  | 4.916    | 341.12422 | —                                          | —   |
| SSB, SB       | 345.21495@2.18  | 345.21495 | 2.18     | 346.22223 | —                                          | —   |
| SSB, SB, AS   | 346.16262@3.85  | 346.16262 | 3.85     | 345.15534 | —                                          | —   |
| AS            | 346.16262@4.744 | 346.16262 | 4.744    | 345.15534 | —                                          | —   |
| SSB           | 346.16267@4.709 | 346.16267 | 4.709    | 347.16995 | —                                          | —   |
| SSB, SB       | 364.09779@0.732 | 364.09779 | 0.732    | 365.10507 | —                                          | —   |
| SSB, SB, AS   | 378.0928@0.759  | 378.0928  | 0.759    | 377.08552 | —                                          | —   |
| AS            | 440.08768@0.759 | 440.08768 | 0.759    | 439.0804  | —                                          | —   |
| SSB           | 453.19967@4.707 | 453.19967 | 4.707    | 454.20695 | —                                          | —   |

<sup>1</sup>Annotations with a dash (—) means biochemical identity is unknown but its monoatomic mass, retention time (RT), and mass-to-charge ratio (m/z) were characterized.

Only metabolites with FDR-adjusted q-value < 0.05 are shown, from models adjusted for age, sex, and energy intake, with a random intercept for each participant. Food-specific metabolites as well as non-specific metabolites (associated with multiple food groups) as shown under “foods”. Abbreviations: AS, added sugar; LNCSB, low- and no-calorie sweetened beverages; MSI, Metabolites standards initiative; SBs, total sweetened beverages; SSB, sugar sweetened beverages.

**Supplemental Table 5:** Metabolites associated with SBs and AS intake in ‘adolescent urine’ (*n* = 339)

| <b>Foods</b> | <b>Metabolite</b>                    | <b>Mass</b> | <b>RT</b> | <b>HMDB ID</b> | <b>Super pathway</b>   |
|--------------|--------------------------------------|-------------|-----------|----------------|------------------------|
| AS           | sucrose                              | 341.10894   | 865       | HMDB00258      | Carbohydrate           |
| SSB, SB      | 3-hydroxyisobutyrate                 | 103.04007   | 1619      | HMDB00336      | Amino Acid             |
| SSB          | 3-hydroxypropanoate                  | 89.02442    | 1845      | HMDB00700      | Lipid                  |
| AS           | indolelactate                        | 204.06661   | 2286      | HMDB00671      | Amino Acid             |
| LNCSB        | 1,6-anhydroglucose                   | 207.05102   | 1175.5    | HMDB00640      | Xenobiotics            |
| LNCSB, SB    | saccharin                            | 181.99173   | 2000      | HMDB29723      | Xenobiotics            |
| SSB, SB      | 2-hydroxyoctanoate                   | 159.10266   | 3736.8    | HMDB02264      | Lipid                  |
| AS           | phenyllactate (PLA)                  | 165.05571   | 908       | HMDB00779      | Amino Acid             |
| SSB, SB      | N-formylmethionine                   | 176.03869   | 1543.8    | HMDB01015      | Amino Acid             |
| AS           | 1-methylhistidine                    | 168.07785   | 1227      | HMDB00001      | Amino Acid             |
| SSB          | 3-hydroxysebacate                    | 217.10814   | 2411      | HMDB00350      | Lipid                  |
| AS           | 3-hydroxyanthranilate                | 154.04987   | 2407      | HMDB01476      | Amino Acid             |
| AS           | decanoylcarnitine (C10)              | 316.24824   | 1130      | HMDB00651      | Lipid                  |
| SSB, AS      | 1-methylxanthine                     | 165.0418    | 1568.8    | HMDB10738      | Xenobiotics            |
| SSB, SB      | 5-acetylamino-6-amino-3-methyluracil | 197.06801   | 1710      | HMDB04400      | Xenobiotics            |
| SSB, SB      | hydroquinone sulfate                 | 188.98631   | 1395      | HMDB02434      | Xenobiotics            |
| SSB, SB      | 3-methyladipate                      | 159.06628   | 2865      | HMDB00555      | Lipid                  |
| SSB          | N-methylhydantoin                    | 113.03565   | 1425      | HMDB03646      | Amino Acid             |
| SSB          | carboxyethyl-GABA                    | 176.09174   | 2085      | HMDB02201      | Amino Acid             |
| SSB, AS      | cis-urocanate                        | 137.03565   | 1200      | HMDB34174      | Amino Acid             |
| SSB, SB      | 2-oxo-1-pyrrolidinepropionate        | 158.08117   | 1600      |                | Xenobiotics            |
| SSB, SB      | N1-Methyl-2-pyridone-5-carboxamide   | 151.0513    | 1668      | HMDB04193      | Cofactors and Vitamins |
| LNCSB, AS    | benzoylcarnitine*                    | 266.13869   | 3041      |                | Xenobiotics            |
| SSB          | 2-aminophenol sulfate                | 188.0023    | 1677      | HMDB61116      | Xenobiotics            |
| SB           | gamma-CEHC                           | 263.12888   | 3843      | HMDB01931      | Cofactors and Vitamins |
| SSB, SB      | X - 21258                            | 213.02316   | 3915      |                |                        |
| SSB, SB      | X - 21312                            | 243.03368   | 2757.7    |                |                        |
| AS           | X - 11478                            | 165.09214   | 4285      |                |                        |
| AS           | X - 12472                            | 241.11935   | 2528      |                |                        |
| SB           | X - 21825                            | 234.07805   | 3220      |                |                        |
| SB           | X - 21831                            | 363.16759   | 3480      |                |                        |
| AS           | X - 21847                            | 403.10512   | 4270      |                |                        |
| AS           | X - 18887                            | 328.15182   | 2229      |                |                        |
| AS           | X - 18410                            | 305.07041   | 1538      |                |                        |
| LNCSB        | X - 11612                            | 283.06849   | 1633      |                |                        |
| AS           | X - 11640                            | 377.07052   | 3769      |                |                        |
| AS           | X - 12101                            | 164.07386   | 2700      |                |                        |
| AS           | X - 11858                            | 437.0555    | 4414      |                |                        |
| SSB, SB      | X - 19299                            | 227.12896   | 3728      |                |                        |
| SSB, SB      | X - 19497                            | 227.12921   | 3643      |                |                        |
| AS           | X - 17327                            | 257.14918   | 2750      |                |                        |
| SSB, SB      | X - 17328                            | 308.18508   | 910       |                |                        |
| SSB          | X - 18126                            | 134.11749   | 2415      |                |                        |
| SSB          | X - 12221                            | 203.99752   | 1467      |                |                        |

|                    |                                                         |           |      |           |                        |
|--------------------|---------------------------------------------------------|-----------|------|-----------|------------------------|
| AS                 | X - 12722                                               | 249.00774 | 1871 |           |                        |
| AS                 | X - 12726                                               | 233.01287 | 1942 |           |                        |
| AS                 | X - 12823                                               | 167.0383  | 2815 |           |                        |
| SB                 | X - 13844                                               | 209.05715 | 1442 |           |                        |
| SSB, AS            | X - 17010                                               | 189.11359 | 3178 |           |                        |
| LNCSB              | X - 17349                                               | 367.10412 | 2497 |           |                        |
| LNCSB, SSB, SB, AS | X - 17679                                               | 199.09797 | 1775 |           |                        |
| LNCSB, SB          | acesulfame                                              | 161.98665 | 1581 | HMDB33585 | Xenobiotics            |
| SB                 | gentisic acid-5-glucoside                               | 315.07215 | 1434 |           | Xenobiotics            |
| SSB, SB            | X - 23587                                               | 132.10181 | 1230 |           |                        |
| AS                 | X - 24330                                               | 225.07673 | 1546 |           |                        |
| SB, AS             | X - 24333                                               | 202.10837 | 1789 |           |                        |
| AS                 | X - 24413                                               | 159.14909 | 2795 |           |                        |
| LNCSB              | X - 24414                                               | 234.08027 | 1965 |           |                        |
| SB                 | X - 24543                                               | 275.02364 | 2823 |           |                        |
| AS                 | 3-hydroxyhexanoate                                      | 131.07136 | 1725 |           | Lipid                  |
| SSB, AS            | caffeic acid sulfate                                    | 258.99179 | 1307 | HMDB41708 | Xenobiotics            |
| SSB, SB, AS        | 3-hydroxybutyrate (BHBA)                                | 103.04007 | 1444 | HMDB00357 | Lipid                  |
| LNCSB, SB          | X - 24794                                               | 123.05621 | 1131 |           |                        |
| SSB                | 3-heptenoylglutamine                                    | 255.13503 | 3220 |           | Lipid                  |
| SSB, SB            | 3-carboxy-4-methyl-5-pentyl-2-furanpropionate (3-CMPFP) | 267.12379 | 4000 |           | Lipid                  |
| SSB, SB            | glucuronide of C10H18O2 (8)*                            | 345.1555  | 3865 |           | PCM                    |
| SB                 | glucuronide of C10H18O2 (9)*                            | 345.1555  | 4010 |           | PCM                    |
| SB                 | glucuronide of C10H14O2 (2)*                            | 341.12419 | 3154 |           | PCM                    |
| AS                 | glucuronide of C8H14O2 (6)*                             | 317.12419 | 4027 |           | PCM                    |
| SSB, SB            | glutamine conjugate of C8H12O4 (2)*                     | 299.12486 | 1143 |           | PCM                    |
| SB                 | gamma-CEHC taurine*                                     | 370.13298 | 3917 |           | Cofactors and Vitamins |
| SSB                | 4-hydroxycatechol sulfate                               | 204.98123 | 1210 |           | Xenobiotics            |
| AS                 | (2,4 or 2,5)-dimethylphenol sulfate                     | 201.0227  | 3474 |           | Xenobiotics            |
| AS                 | 1-carboxyethylisoleucine                                | 202.10848 | 2628 |           | Amino Acid             |
| SSB, SB            | 4-acetylcatechol sulfate (1)                            | 230.99688 | 1774 |           | Xenobiotics            |
| SSB                | 4-acetylcatechol sulfate (2)                            | 230.99688 | 2193 |           | Xenobiotics            |
| SSB                | hydroxy-N6,N6,N6-trimethyllysine*                       | 205.15468 | 2759 |           | Amino Acid             |
| SSB, SB            | N,N-dimethylalanine                                     | 118.08626 | 1370 |           | Amino Acid             |
| LNCSB              | 3-hydroxyisonicotinic acid                              | 138.01966 | 1497 |           | Xenobiotics            |
| LNCSB              | 5-hydroxy-2-methylpyridine sulfate                      | 188.0023  | 2074 |           | Xenobiotics            |
| SSB                | pentose acid*                                           | 165.04046 | 2180 |           | PCM                    |

The food-related metabolites summarized in this table had FDR-adjusted q-value < 0.05, from models adjusted for age, sex, energy intake, physical activity, alcohol and smoking status. Food-specific metabolites as well as non-specific metabolites are shown under "Foods".

Metabolites with a prefix "X-" followed by a number (e.g., X - 17679) are molecular features whose biochemical identities are unknown, but their monoatomic mass and retention time (RT) were characterized. \*Indicates metabolites that were not confirmed based on a standard, but Metabolon are confident in its identity.

Abbreviations: AS, added sugar; LNCSB, low- and no-calorie sweetened beverages; PCM, partially characterized molecules; SBs, total sweetened beverages; SSB, sugar sweetened beverages.

**Supplemental Table 6.** Metabolites associated with SBs and AS intake in ‘young adult plasma’ (*n* = 195)

| <b>Foods</b> | <b>Metabolite</b>                                                   | <b>Mass</b> | <b>RT</b> | <b>HMDB</b> | <b>Super pathway</b>   |
|--------------|---------------------------------------------------------------------|-------------|-----------|-------------|------------------------|
| SSB, SB      | 1,3-dimethylurate                                                   | 195.0524    | 1671.4    | HMDB01857   | Xenobiotics            |
| SSB, SB, AS  | 1-methylxanthine                                                    | 165.0418    | 1568.8    | HMDB10738   | Xenobiotics            |
| SSB, SB, AS  | AAMU                                                                | 197.068     | 1710      | HMDB04400   | Xenobiotics            |
| SB           | hydroquinone sulfate                                                | 188.9863    | 1395      | HMDB02434   | Xenobiotics            |
| SSB          | 4-cholesten-3-one                                                   | 385.3465    | 2520      | HMDB00921   | Lipid                  |
| SB           | X – 11308                                                           | -           | -         | -           | -                      |
| SSB          | X – 13866                                                           | -           | -         | -           | -                      |
| AS           | etiocolanolone glucuronide                                          | 465.2494    | 4915      | HMDB04484   | Lipid                  |
| SB           | X - 17340                                                           | -           | -         | -           | -                      |
| SSB, SB      | X - 16087                                                           | -           | -         | -           | -                      |
| SB           | N-formylphenylalanine                                               | 192.0666    | 2360      | -           | Amino Acid             |
| SB           | X - 24337                                                           | -           | -         | -           | -                      |
| LNCSB, SB    | adipoylcarnitine (C6-DC)                                            | 290.1598    | 2570      | HMDB61677   | Lipid                  |
| SSB          | X – 24669                                                           | -           | -         | -           | -                      |
| SSB, SB      | caffeine                                                            | 195.0877    | 2106      | HMDB01847   | Xenobiotics            |
| SB           | dihomo-linolenoylcarnitine (C20:3n3 or 6)*                          | 450.3578    | 1392      | -           | Lipid                  |
| SSB          | carotene diol (1)                                                   | 568.4276    | 1720      | -           | Cofactors and Vitamins |
| SB           | X - 24951                                                           | -           | -         | -           | -                      |
| LNCSB        | octadecanedioylcarnitine (C18-DC)*                                  | 458.3476    | 1227      | -           | Lipid                  |
| SSB, SB      | 3-CMPFP                                                             | 267.1238    | 4000      | HMDB61643   | Lipid                  |
| SSB          | branched-chain, straight-chain, or cyclopropyl 10:1 fatty acid (1)* | 169.1234    | 4805      | -           | PCM                    |
| SB           | glutamine conjugate of C6H10O2 (1)*                                 | 241.1194    | 2404      | -           | PCM                    |
| LNCSB        | 3-bromo-5-chloro-2,6-dihydroxybenzoic acid*                         | 264.8909    | 4505      | -           | Xenobiotics            |

The food-related metabolites summarized in this table had FDR-adjusted q-value < 0.05. All models were adjusted for age, sex, energy intake, physical activity, alcohol and smoking status, number of dietary assessments, and the difference in time between dietary assessment and blood draw. Food-specific metabolites as well as non-specific metabolites (associated with multiple food groups) as shown under “Foods”.

Metabolites with a prefix “X-” followed by a number (e.g., X – 11308) are molecular features whose biochemical identities could not be identified, but their monoatomic mass and retention time (RT) were characterized. \*Indicates metabolites that were not confirmed based on a standard, but Metabolon are confident in its identity.

Abbreviations: 3-CMPFP, 3-carboxy-4-methyl-5-pentyl-2-furanpropionate; AAMU, 5-acetylamino-6-amino-3-methyluracil; AS, added sugar; LNCSB, low- and no-calorie sweetened beverages; SB, sweetened beverages; SSB, sugar sweetened beverages.

**Supplemental Table 7:** Associations of coffee intake with caffeine metabolites in ‘adolescent urine’ (n = 339) and ‘young adult plasma’ (n = 195)

| <b>Adolescent Urine</b>   |                |                      | <b>95% CI</b>   |              |              |
|---------------------------|----------------|----------------------|-----------------|--------------|--------------|
| <b>Metabolite</b>         | <b>HMDB ID</b> | <b>Super pathway</b> | <b>Estimate</b> | <b>Lower</b> | <b>Upper</b> |
| 1-methylurate             | HMDB03099      | Xenobiotics          | 0.0048          | 0.0037       | 0.0059       |
| AAMU                      | HMDB04400      | Xenobiotics          | 0.0046          | 0.0035       | 0.0057       |
| 1-methylxanthine          | HMDB10738      | Xenobiotics          | 0.0047          | 0.0035       | 0.0058       |
| paraxanthine              | HMDB01860      | Xenobiotics          | 0.0045          | 0.0034       | 0.0056       |
| theophylline              | HMDB01889      | Xenobiotics          | 0.0044          | 0.0033       | 0.0055       |
| caffeine                  | HMDB01847      | Xenobiotics          | 0.0039          | 0.0028       | 0.0050       |
| 1,3,7-trimethylurate      | HMDB02123      | Xenobiotics          | 0.0038          | 0.0027       | 0.0049       |
| 1,7-dimethylurate         | HMDB11103      | Xenobiotics          | 0.0038          | 0.0027       | 0.0049       |
| 7-methylurate             | HMDB11107      | Xenobiotics          | 0.0005          | -0.0007      | 0.0017       |
| 7-methylxanthine          | HMDB01991      | Xenobiotics          | 0.0003          | -0.0009      | 0.0015       |
| theobromine               | HMDB02825      | Xenobiotics          | -0.0003         | -0.0015      | 0.0009       |
| 3-methylurate*            |                | Xenobiotics          | 0.0001          | -0.0011      | 0.0013       |
| 3,7-dimethylurate         | HMDB01982      | Xenobiotics          | -0.0001         | -0.0012      | 0.0011       |
| 3-methylxanthine          | HMDB01886      | Xenobiotics          | -0.0001         | -0.0013      | 0.0012       |
| <b>Young Adult Plasma</b> |                |                      |                 |              |              |
| AAMU                      | HMDB04400      | Xenobiotics          | 0.0064          | 0.0037       | 0.0092       |
| theophylline              | HMDB01889      | Xenobiotics          | 0.0055          | 0.0027       | 0.0084       |
| 1,3-dimethylurate         | HMDB01857      | Xenobiotics          | 0.0055          | 0.0027       | 0.0084       |
| 1-methylxanthine          | HMDB10738      | Xenobiotics          | 0.0052          | 0.0024       | 0.0081       |
| 1,7-dimethylurate         | HMDB11103      | Xenobiotics          | 0.0050          | 0.0022       | 0.0079       |
| AFMU                      | HMDB11105      | Xenobiotics          | 0.0049          | 0.0020       | 0.0078       |
| paraxanthine              | HMDB01860      | Xenobiotics          | 0.0049          | 0.0020       | 0.0078       |
| caffeine                  | HMDB01847      | Xenobiotics          | 0.0037          | 0.0008       | 0.0066       |
| 7-methylxanthine          | HMDB01991      | Xenobiotics          | 0.0014          | -0.0017      | 0.0044       |
| theobromine               | HMDB02825      | Xenobiotics          | 0.0010          | -0.0019      | 0.0040       |
| 3-methylxanthine          | HMDB01886      | Xenobiotics          | 0.0009          | -0.0021      | 0.0038       |
| 3,7-dimethylurate         | HMDB01982      | Xenobiotics          | 0.0003          | -0.0027      | 0.0033       |

All caffeine and caffeine related metabolites measured in our data were analyzed.

Adolescent urine: Models were adjusted for age, sex, energy intake, physical activity, smoking and alcohol status.

Young adult plasma: All adjustments for adolescent urine, plus time difference between dietary assessment and blood draw (difference = age at blood draw – mean age of dietary assessments) and the number of dietary assessments to reflect its analytic design.

\*Indicates metabolites that were not confirmed based on a standard, but Metabolon are confident in its identity.

Abbreviations: AAMU, 5-acetylamino-6-amino-3-methyluracil; AFMU, 5-acetylamino-6-formylamino-3-methyluracil; CI, confidence intervals;

**Supplemental Table 8:** Associations of SSB intake with all caffeine metabolites in ‘adolescent urine’ (n = 339) and ‘young adult plasma’ (n = 195)

| Adolescent Urine     |           |               | 95% CI   |          |         |
|----------------------|-----------|---------------|----------|----------|---------|
| Metabolite           | HMDB ID   | Super pathway | Estimate | Lower    | Upper   |
| 1-methylxanthine     | HMDB10738 | Xenobiotics   | 0.00054  | 0.00029  | 0.00078 |
| AAMU                 | HMDB04400 | Xenobiotics   | 0.00050  | 0.00026  | 0.00074 |
| paraxanthine         | HMDB01860 | Xenobiotics   | 0.00047  | 0.00022  | 0.00072 |
| theophylline         | HMDB01889 | Xenobiotics   | 0.00046  | 0.00022  | 0.00070 |
| 1,7-dimethylurate    | HMDB11103 | Xenobiotics   | 0.00044  | 0.00020  | 0.00069 |
| 1,3,7-trimethylurate | HMDB02123 | Xenobiotics   | 0.00042  | 0.00018  | 0.00066 |
| 1-methylurate        | HMDB03099 | Xenobiotics   | 0.00040  | 0.00016  | 0.00065 |
| caffeine             | HMDB01847 | Xenobiotics   | 0.00040  | 0.00016  | 0.00064 |
| theobromine          | HMDB02825 | Xenobiotics   | 0.00006  | -0.00019 | 0.00032 |
| 3-methylxanthine     | HMDB01886 | Xenobiotics   | 0.00006  | -0.00019 | 0.00031 |
| 7-methylurate        | HMDB11107 | Xenobiotics   | 0.00004  | -0.00022 | 0.00029 |
| 7-methylxanthine     | HMDB01991 | Xenobiotics   | 0.00004  | -0.00022 | 0.00029 |
| 3,7-dimethylurate    | HMDB01982 | Xenobiotics   | 0.00003  | -0.00021 | 0.00028 |
| 3-methylurate*       |           | Xenobiotics   | -0.00001 | -0.00026 | 0.00024 |
| Young Adult Plasma   |           |               |          |          |         |
| 1-methylxanthine     | HMDB10738 | Xenobiotics   | 0.00104  | 0.00052  | 0.00156 |
| 1,7-dimethylurate    | HMDB11103 | Xenobiotics   | 0.00103  | 0.00051  | 0.00156 |
| theophylline         | HMDB01889 | Xenobiotics   | 0.00101  | 0.00049  | 0.00154 |
| caffeine             | HMDB01847 | Xenobiotics   | 0.00103  | 0.00049  | 0.00158 |
| paraxanthine         | HMDB01860 | Xenobiotics   | 0.00101  | 0.00048  | 0.00155 |
| AAMU                 | HMDB04400 | Xenobiotics   | 0.00096  | 0.00045  | 0.00147 |
| 1,3-dimethylurate    | HMDB01857 | Xenobiotics   | 0.00091  | 0.00039  | 0.00144 |
| AFMU                 | HMDB11105 | Xenobiotics   | 0.00070  | 0.00015  | 0.00124 |
| 3,7-dimethylurate    | HMDB01982 | Xenobiotics   | -0.00028 | -0.00084 | 0.00028 |
| 7-methylxanthine     | HMDB01991 | Xenobiotics   | -0.00007 | -0.00064 | 0.00049 |
| theobromine          | HMDB02825 | Xenobiotics   | 0.00007  | -0.00048 | 0.00061 |
| 3-methylxanthine     | HMDB01886 | Xenobiotics   | -0.00002 | -0.00056 | 0.00053 |

All caffeine and caffeine related metabolites measured in our data were analyzed.

Adolescent urine: Models were adjusted for age, sex, energy intake, physical activity, smoking and alcohol status, chocolate, powdered instant beverages, and coffee intake.

Young adult plasma: Models includes all adjustments for adolescent urine samples, plus time difference between dietary assessment and blood draw (difference = age at blood draw – mean age of dietary assessments) and the number of dietary assessments to reflect its analytic design.

\*Indicates metabolites that were not confirmed based on a standard, but Metabolon are confident in its identity based on their biochemical identification criteria and chemical properties.

Abbreviations: AAMU, 5-acetylamino-6-amino-3-methyluracil; AFMU, 5-acetylamino-6-formylamino-3-methyluracil; CI, confidence intervals;



**Supplemental Figure 3.** Assessing potential bias due to different imputation methods on food-metabolite associations

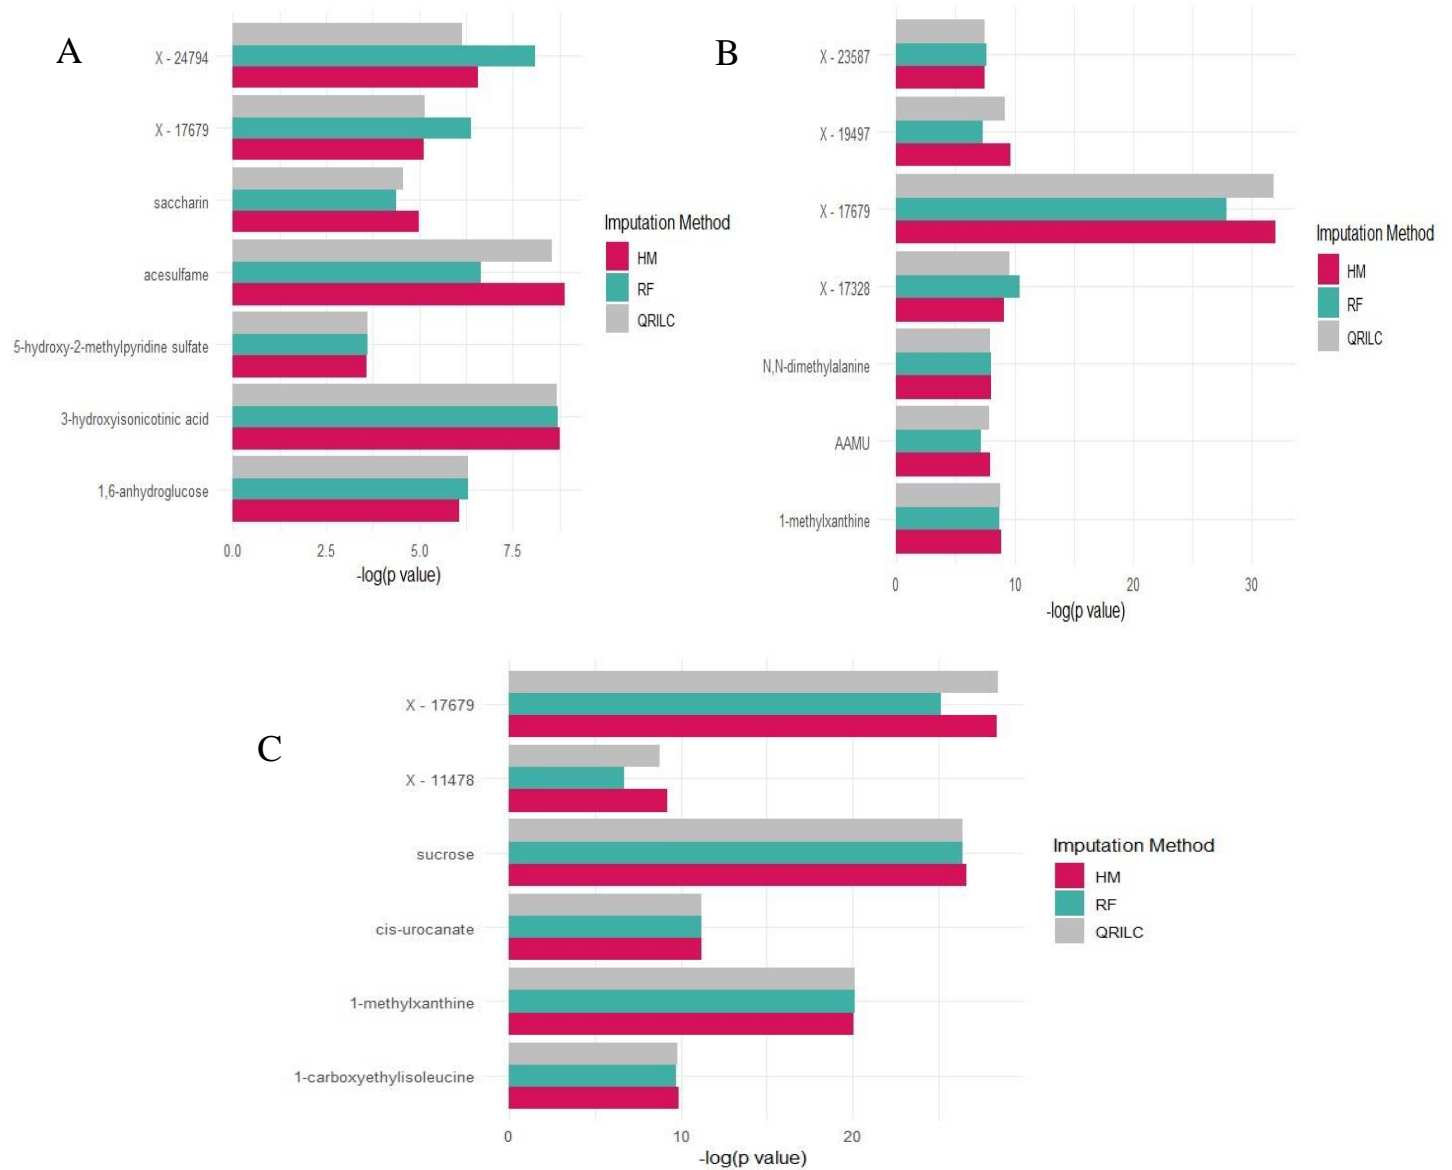

**Supplemental Figure 3.** Assessing potential bias due to different imputation methods on food-metabolite associations in ‘adolescent urine’,  $n = 339$ . **A** – LNCSEB, low – and no-calorie sweetened beverages; **B** – SSB, Sugar-sweetened Beverages; **C** – AS, Added sugar models. Using adolescent urine analytic sample, we compared food-metabolite results (Half-minimum [HM] imputation) with other imputation methods for the assumption of left-censored data (Quantile regression imputation for left censored data, QRILC) and missing completely at random/missing at random (Random forest, RF). The results suggested that the imputation methods HM, QRILC, and RF yielded comparable results for most of the associations supporting our main findings. For visualization purposes, only the top metabolites (by regression estimate) with FDR-corrected p-value,  $q < 0.05$  are shown. The models for food-metabolite associations were adjusted for age, sex, energy intake, physical activity, smoking, and alcohol status.

**Supplemental Table 9.** Food-related metabolites associated with adiposity using regularized regression in ‘adolescent urine’

| metabolite                          | BMI ( <i>n</i> = 339) <sup>1</sup> | % BF ( <i>n</i> = 339) <sup>1</sup> | WC ( <i>n</i> = 231) <sup>1</sup> |
|-------------------------------------|------------------------------------|-------------------------------------|-----------------------------------|
| decanoylcarnitine (C10)             | 0.23                               | 0.19                                | 0.30                              |
| acesulfame                          | 0.18                               | 0.10                                | 0.11                              |
| 3-hydroxyhexanoate                  | -0.14                              | -0.08                               | -0.2                              |
| X - 24333                           | 0.14                               | —                                   | —                                 |
| gamma-CEHC taurine*                 | -0.13                              | -0.08                               | -0.11                             |
| X - 18887                           | -0.12                              | -0.04                               | -0.08                             |
| glutamine conjugate of C8H12O4 (2)* | -0.12                              | -0.03                               | -0.11                             |
| 3-hydroxyisonicotinic acid          | -0.10                              | -0.01                               | -0.11                             |
| N1-Methyl-2-pyridone-5-carboxamide  | 0.10                               | 0.08                                | 0.12                              |
| glucuronide of C8H14O2 (6)*         | 0.10                               | 0.07                                | 0.12                              |
| X - 17010                           | -0.09                              | -0.05                               | -0.08                             |
| carboxyethyl-GABA                   | -0.08                              | -0.07                               | -0.09                             |
| X - 11858                           | 0.07                               | 0.03                                | 0.06                              |
| N,N-dimethylalanine                 | -0.07                              | -0.11                               | -0.12                             |
| X - 17679                           | -0.07                              | —                                   | -0.13                             |
| 3-CMPFP                             | 0.06                               | 0.04                                | 0.03                              |
| X - 21847                           | 0.06                               | —                                   | 0.03                              |
| 3-methyladipate                     | -0.06                              | —                                   | -0.02                             |
| phenyllactate (PLA)                 | 0.05                               | —                                   | —                                 |
| X - 12472                           | 0.05                               | —                                   | 0.07                              |
| cis-urocanate                       | -0.05                              | —                                   | -0.14                             |
| X - 17328                           | 0.05                               | —                                   | —                                 |
| X - 13844                           | -0.04                              | -0.09                               | -0.05                             |
| 3-heptenoylglutamine                | -0.04                              | —                                   | —                                 |
| 3-hydroxysebacate                   | -0.04                              | -0.02                               | -0.05                             |
| 1-carboxyethylisoleucine            | 0.03                               | —                                   | 0.11                              |
| pentose acid*                       | -0.03                              | —                                   | —                                 |
| X - 11612                           | -0.02                              | -0.03                               | -0.03                             |
| hydroxy-N6,N6,N6-trimethyllysine*   | 0.02                               | —                                   | 0.04                              |
| X - 24330                           | 0.01                               | 0.01                                | —                                 |
| 3-hydroxybutyrate (BHBA)            | -0.01                              | —                                   | —                                 |
| 3-hydroxypropanoate                 | 0.01                               | 0.05                                | 0.04                              |
| X - 21258                           | —                                  | -0.03                               | —                                 |
| 2-oxo-1-pyrrolidinepropionate       | —                                  | -0.01                               | —                                 |
| caffeic acid sulfate                | —                                  | -0.01                               | -0.08                             |
| hydroquinone sulfate                | —                                  | -0.01                               | -0.03                             |
| saccharin                           | —                                  | —                                   | 0.06                              |
| X - 24414                           | —                                  | —                                   | 0.05                              |
| X - 21312                           | —                                  | —                                   | 0.04                              |
| X - 12726                           | —                                  | —                                   | 0.04                              |
| X - 21831                           | —                                  | —                                   | -0.03                             |
| 2-hydroxyoctanoate                  | —                                  | —                                   | -0.01                             |
| 3-hydroxyanthranilate               | —                                  | —                                   | 0.01                              |

Linear regression models were applied to adjust metabolite levels for confounders (age, sex, energy intake, birthweight, time difference between urine collection and anthropometric measurements, physical activity, smoking, and alcohol status). For each of the adiposity measure (outcome variables), the confounder-adjusted metabolites (predictors) were then fit in an adaptive elastic-net regression model, using the inverse of the absolute ridge regression weights as penalty factors. We used the ‘nestedcv’ R package for nested cross-validation, training models in the inner loop and evaluating them in the outer loop as per author recommendations [4] .

Only food-related metabolites associated (non-zero values) with at least one of the three anthropometric measures are shown in this table.

<sup>1</sup>A dash [—] indicates that the metabolite had no association with that anthropometric measure.

Metabolites with a prefix 'X-' followed by a number (e.g., X - 24333) are molecular features whose biochemical identities could not be identified. \*Indicates metabolites that were not confirmed based on a standard, but Metabolon Inc are confident in its identity based on their biochemical identification criteria and chemical properties.

Abbreviations: %BF, body fat percentage; 3-CMPFP, 3-carboxy-4-methyl-5-pentyl-2-furanpropionate; BMI, body mass index; WC, waist circumference.

**Supplemental Table 10.** Food-related metabolites associated with adiposity using regularized regression ‘young adult plasma’ (n = 195)

| Metabolite                                  | BMI <sup>1</sup> | % BF <sup>1</sup> | WC <sup>1</sup> |
|---------------------------------------------|------------------|-------------------|-----------------|
| X - 17340                                   | 0.25             | 0.16              | 0.16            |
| X - 24337                                   | 0.17             | 0.02              | 0.12            |
| carotene diol (1)                           | -0.13            | -0.07             | -0.16           |
| X - 13866                                   | -0.13            | -0.05             | -0.09           |
| X - 24669                                   | -0.12            | -0.08             | -0.04           |
| octadecanedioylcarnitine (C18-DC)*          | -0.10            | -0.10             | -0.12           |
| X - 11308                                   | -0.09            | -0.07             | -0.07           |
| 5-acetylamino-6-amino-3-methyluracil        | 0.08             | 0.03              | —               |
| 4-cholesten-3-one                           | 0.07             | 0.05              | —               |
| adipoylcarnitine (C6-DC)                    | 0.04             | —                 | —               |
| dihomo-linolenoylcarnitine (C20:3n3 or 6)*  | -0.03            | —                 | —               |
| cyclopropyl 10:1 fatty acid (1)*            | -0.02            | -0.06             | —               |
| 3-bromo-5-chloro-2,6-dihydroxybenzoic acid* | -0.01            | -0.07             | -0.02           |
| X - 16087                                   | —                | 0.02              | 0.03            |
| N-formylphenylalanine                       | —                | 0.02              | 0.01            |
| X - 24951                                   | —                | —                 | 0.06            |
| 3-CMPFP                                     | —                | —                 | 0.05            |
| glutamine conjugate of C6H10O2 (1)*         | —                | —                 | -0.01           |

Linear regression models were applied to adjust metabolite levels for confounders (age, sex, energy intake, birthweight, time difference between blood collection and anthropometric measurements, physical activity, smoking, and alcohol status, time difference between dietary assessment and blood draw and the number of dietary assessments). For each of the adiposity measures (outcome variables), the confounder-adjusted metabolites (predictors) were then fit in an adaptive elastic-net regression model, using the inverse of the absolute ridge regression weights as penalty factors. We used the ‘nestedcv’ R package for nested cross-validation, training models in the inner loop and evaluating them in the outer loop as per author recommendations [4].

Only food-related metabolites associated (non-zero values) with at least one of the three anthropometric measures are shown in this table.

<sup>1</sup>A dash [—] indicates that the metabolite had no association with that anthropometric measure.

Metabolites with a prefix ‘X-’ followed by a number (e.g., X - 24333) are molecular features whose biochemical identities could not be identified. \*Indicates metabolites that were not confirmed based on a standard, but Metabolon Inc are confident in its identity based on their biochemical identification criteria and chemical properties.

Abbreviations: % BF, body fat percentage; 3-CMPFP, 3-carboxy-4-methyl-5-pentyl-2-furanpropionate; BMI, body mass index; WC, waist circumference.

## References

1. Wishart, D.S., Feunang, Y.D., Marcu, A., Guo, A.C., Liang, K., Vázquez-Fresno, R., Sajed, T., Johnson, D., Li, C., Karu, N., Sayeeda, Z., Lo, E., Assempour, N., Berjanskii, M., Singhal, S., Arndt, D., Liang, Y., Badran, H., Grant, J., Serra-Cayuela, A., Liu, Y., Mandal, R., Neveu, V., Pon, A., Knox, C., Wilson, M., Manach, C., Scalbert, A.: HMDB 4.0: the human metabolome database for 2018. *Nucleic acids research* (2018). <https://doi.org/10.1093/nar/gkx1089>
2. Smith, C.A., O'Maille, G., Want, E.J., Qin, C., Trauger, S.A., Brandon, T.R., Custodio, D.E., Abagyan, R., Siuzdak, G.: METLIN: a metabolite mass spectral database. *Therapeutic drug monitoring* (2005). <https://doi.org/10.1097/01.ftd.0000179845.53213.39>
3. Sumner, L.W., Amberg, A., Barrett, D., Beale, M.H., Beger, R., Daykin, C.A., Fan, T.W.-M., Fiehn, O., Goodacre, R., Griffin, J.L., Hankemeier, T., Hardy, N., Harnly, J., Higashi, R., Kopka, J., Lane, A.N., Lindon, J.C., Marriott, P., Nicholls, A.W., Reily, M.D., Thaden, J.J., Viant, M.R.: Proposed minimum reporting standards for chemical analysis Chemical Analysis Working Group (CAWG) Metabolomics Standards Initiative (MSI). *Metabolomics : Official journal of the Metabolomic Society* (2007). <https://doi.org/10.1007/s11306-007-0082-2>
4. Lewis M.J, Spiliopoulou A., Goldmann, K., Pitzalis, C., McKeigue, P., Barnes, M.R. nestedcv: An R package for fast implementation of nested cross-validation with embedded feature selection designed for transcriptomics and high-dimensional data. *Bioinform Adv.* 3 (2023), vbad048.
